# Supplementary material for: Development of the TrAnsparent ReportinG of observational studies Emulating a Target trial (TARGET) guideline
Source: PubMed Central journal article supplement (PMC10503363; doi:10.1136/bmjopen-2023-074626), 2023-09-12
Supplement: bmjopen-2023-074626.draft_revisions.pdf [file bmjopen-2023-074626.draft_revisions.pdf]

# BMJ Open

BMJ Open is committed to open peer review. As part of this commitment we make the peer review history of every article we publish publicly available.

When an article is published we post the peer reviewers' comments and the authors' responses online. We also post the versions of the paper that were used during peer review. These are the versions that the peer review comments apply to.

The versions of the paper that follow are the versions that were submitted during the peer review process. They are not the versions of record or the final published versions. They should not be cited or distributed as the published version of this manuscript.

BMJ Open is an open access journal and the full, final, typeset and author-corrected version of record of the manuscript is available on our site with no access controls, subscription charges or pay-per-view fees (<http://bmjopen.bmj.com>).

If you have any questions on BMJ Open's open peer review process please email [info.bmjopen@bmj.com](mailto:info.bmjopen@bmj.com)

# BMJ Open

## Development of the Transparent Reporting of Observational Studies Emulating a Target Trial (TARGET) Guideline

|                               |                                                                                                                                                                                                                                                                                                                                                                                                                                                                                                                                                                                                                                                                                                                                                                                                                                                                                                                                                                                                                                                                                                                                                                                                                                                                                                                                                                                                                                                                                                                                                                                                                                                                                                                                                                                                                                                                                                                                                                                                                                                                                                                                                                                                                                                                                                                                                                                                                                                        |
|-------------------------------|--------------------------------------------------------------------------------------------------------------------------------------------------------------------------------------------------------------------------------------------------------------------------------------------------------------------------------------------------------------------------------------------------------------------------------------------------------------------------------------------------------------------------------------------------------------------------------------------------------------------------------------------------------------------------------------------------------------------------------------------------------------------------------------------------------------------------------------------------------------------------------------------------------------------------------------------------------------------------------------------------------------------------------------------------------------------------------------------------------------------------------------------------------------------------------------------------------------------------------------------------------------------------------------------------------------------------------------------------------------------------------------------------------------------------------------------------------------------------------------------------------------------------------------------------------------------------------------------------------------------------------------------------------------------------------------------------------------------------------------------------------------------------------------------------------------------------------------------------------------------------------------------------------------------------------------------------------------------------------------------------------------------------------------------------------------------------------------------------------------------------------------------------------------------------------------------------------------------------------------------------------------------------------------------------------------------------------------------------------------------------------------------------------------------------------------------------------|
| Journal:                      | <i>BMJ Open</i>                                                                                                                                                                                                                                                                                                                                                                                                                                                                                                                                                                                                                                                                                                                                                                                                                                                                                                                                                                                                                                                                                                                                                                                                                                                                                                                                                                                                                                                                                                                                                                                                                                                                                                                                                                                                                                                                                                                                                                                                                                                                                                                                                                                                                                                                                                                                                                                                                                        |
| Manuscript ID                 | bmjopen-2023-074626                                                                                                                                                                                                                                                                                                                                                                                                                                                                                                                                                                                                                                                                                                                                                                                                                                                                                                                                                                                                                                                                                                                                                                                                                                                                                                                                                                                                                                                                                                                                                                                                                                                                                                                                                                                                                                                                                                                                                                                                                                                                                                                                                                                                                                                                                                                                                                                                                                    |
| Article Type:                 | Protocol                                                                                                                                                                                                                                                                                                                                                                                                                                                                                                                                                                                                                                                                                                                                                                                                                                                                                                                                                                                                                                                                                                                                                                                                                                                                                                                                                                                                                                                                                                                                                                                                                                                                                                                                                                                                                                                                                                                                                                                                                                                                                                                                                                                                                                                                                                                                                                                                                                               |
| Date Submitted by the Author: | 12-Apr-2023                                                                                                                                                                                                                                                                                                                                                                                                                                                                                                                                                                                                                                                                                                                                                                                                                                                                                                                                                                                                                                                                                                                                                                                                                                                                                                                                                                                                                                                                                                                                                                                                                                                                                                                                                                                                                                                                                                                                                                                                                                                                                                                                                                                                                                                                                                                                                                                                                                            |
| Complete List of Authors:     | <p>Hansford, Harrison; University of New South Wales; Neuroscience Research Australia</p> <p>Cashin, Aidan; Neuroscience Research Australia, Centre for Pain IMPACT; University of New South Wales, School of Health Sciences, Faculty of Medicine and Health</p> <p>Jones, Matthew; University of New South Wales; Neuroscience Research Australia, Centre for Pain IMPACT</p> <p>Swanson, Sonja; University of Pittsburgh, Department of Epidemiology; Harvard T.H. Chan School of Public Health, CAUSALab, Department of Epidemiology</p> <p>Islam, Nazrul; University of Oxford, Big data institute; University of Southampton, Faculty of Medicine</p> <p>Dahabreh, Isa; , Beth Israel Deaconess Medical Center and Harvard Medical School, Richard A. and Susan F. Smith Center for Outcomes Research; Harvard T.H. Chan School of Public Health, CAUSALab, Department of Epidemiology, Department of Biostatistics</p> <p>Dickerman, Barbra; Harvard TH Chan School of Public Health, CAUSALab; Harvard TH Chan School of Public Health, Department of Epidemiology</p> <p>Egger, Matthias; University of Bern, Institute of Social &amp; Preventive Medicine; University of Cape Town Faculty of Health Sciences, Centre for Infectious Disease Epidemiology and Research</p> <p>Garcia-De-Albeniz, Xavier ; Harvard University T H Chan School of Public Health, CAUSALab; RTI Health Solutions Barcelona</p> <p>Golub, Robert ; Northwestern University Feinberg School of Medicine</p> <p>Lodi, Sara; Harvard TH Chan School of Public Health, CAUSALab; Boston University School of Public Health, Department of Biostatistics</p> <p>Moreno-Betancur , Margarita ; Murdoch Children's Research Institute, Melbourne, Clinical Epidemiology &amp; Biostatistics Unit; The University of Melbourne, Department of Paediatrics</p> <p>Pearson, Sallie-Anne; University of New South Wales, School of Population Health</p> <p>Schneeweiss , Sebastian ; Harvard Medical School, Boston, USA, Division of Pharmacoepidemiology, Department of Medicine, Brigham &amp; Women's Hospital,</p> <p>Sterne, Jonathan; University of Bristol, Department of Population Health Sciences; NIHR Bristol Biomedical Research Centre</p> <p>Sharp, Melissa; RCSI University of Medicine and Health Sciences, Department of General Practice</p> <p>Stuart, Elizabeth A; Johns Hopkins Bloomberg School of Public Health, Department of Mental Health</p> |

1  
2  
3  
4  
5  
6  
7  
8  
9  
10  
11  
12  
13  
14  
15  
16  
17  
18  
19  
20  
21  
22  
23  
24  
25  
26  
27  
28  
29  
30  
31  
32  
33  
34  
35  
36  
37  
38  
39  
40  
41  
42  
43  
44  
45  
46  
47  
48  
49  
50  
51  
52  
53  
54  
55  
56  
57  
58  
59  
60

|           |                                                                                                                                                                                                                                                                                                                                                                                 |
|-----------|---------------------------------------------------------------------------------------------------------------------------------------------------------------------------------------------------------------------------------------------------------------------------------------------------------------------------------------------------------------------------------|
|           | Hernan, M; Harvard School of Public Health, CAUSALab; Harvard T.H Chan School of Public Health, Department of Epidemiology, Department of Biostatistics<br>Lee, Hopin; University of Exeter Medical School<br>McAuley, James; University of New South Wales, School of Health Sciences, Faculty of Medicine and Health; Neuroscience Research Australia, Centre for Pain IMPACT |
| Keywords: | EPIDEMIOLOGY, Retrospective Studies, STATISTICS & RESEARCH METHODS                                                                                                                                                                                                                                                                                                              |
|           |                                                                                                                                                                                                                                                                                                                                                                                 |

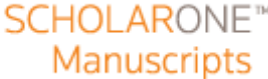

# 1 Development of the Transparent Reporting of Observational Studies Emulating a Target 2 Trial (TARGET) Guideline

3  
4 Harrison J. Hansford<sup>1,2</sup>, Aidan G. Cashin<sup>1,2</sup>, Matthew D. Jones<sup>1,2</sup>, Sonja A. Swanson<sup>3,8,9</sup>,  
5 Nazrul Islam<sup>5,6</sup>, Issa J. Dahabreh<sup>7,8,9,10</sup>, Barbra A. Dickerman<sup>8,9</sup>, Matthias Egger<sup>11,12,13</sup>,  
6 Xabier Garcia-Albeniz<sup>8,14</sup>, Robert M. Golub<sup>15</sup>, Sara Lodi<sup>8,16</sup>, Margarita Moreno-  
7 Betancur<sup>17,18</sup>, Sallie-Anne Pearson<sup>19</sup>, Sebastian Schneeweiss<sup>20</sup>, Jonathan A. C.  
8 Sterne<sup>21,22,23</sup>, Melissa K. Sharp<sup>24</sup>, Elizabeth A. Stuart<sup>25</sup>, Miguel A. Hernán<sup>8,9,10</sup>, Hopin  
9 Lee<sup>26</sup>, James H. McAuley<sup>1,2</sup>

10  
11 1. School of Health Sciences, Faculty of Medicine and Health, University of New South Wales,  
12 Sydney, Australia

13 2. Centre for Pain IMPACT, Neuroscience Research Australia, Sydney, Australia

14 3. Department of Epidemiology, University of Pittsburgh, Pittsburgh, United States of America

15 5. Oxford Population Health, Big Data Institute, University of Oxford, Oxford, UK

16 6. Faculty of Medicine, University of Southampton, Southampton, UK

17 7. Richard A. and Susan F. Smith Center for Outcomes Research, Beth Israel Deaconess  
18 Medical Center and Harvard Medical School, Boston, MA, USA

19 8. CAUSALab, Harvard T.H. Chan School of Public Health, Boston, MA, USA

20 9. Department of Epidemiology, Harvard T.H. Chan School of Public Health, Boston, MA, USA

21 10. Department of Biostatistics, Harvard T.H. Chan School of Public Health, Boston, MA, USA

22 11. Institute of Social and Preventive Medicine, University of Bern, Bern, Switzerland

23 12. Centre for Infectious Disease Epidemiology and Research, Faculty of Health Sciences,  
24 University of Cape Town, Cape Town, South Africa

25 13. Population Health Sciences, Bristol Medical School, University of Bristol, Bristol, UK

26 14. RTI Health Solutions, Barcelona, Spain

27 15. Northwestern University Feinberg School of Medicine, Chicago, IL, USA

28 16. Department of Biostatistics, Boston University School of Public Health, Boston, MA, USA

29 17. Clinical Epidemiology & Biostatistics Unit, Murdoch Children's Research Institute, Royal  
30 Children's Hospital, 50 Flemington Rd, Parkville, Melbourne, VIC, Australia

31 18. Department of Paediatrics, The University of Melbourne, Parkville, Australia

- 1  
2  
3 32 19. School of Population Health, Faculty of Medicine and Health, UNSW Sydney, Sydney,  
4 33 Australia  
5  
6 34 20. Division of Pharmacoepidemiology, Department of Medicine, Brigham & Women's Hospital,  
7 35 Harvard Medical School, Boston, MA, USA  
8  
9 36 21. Department of Population Health Sciences, Bristol Medical School, University of Bristol, UK  
10 37 22. NIHR Bristol Biomedical Research Centre, UK  
11  
12 38 23. Health Data Research UK South-West, Bristol, UK  
13  
14 39 24. Department of General Practice, RCSI University of Medicine and Health Sciences, Dublin,  
15 40 Ireland  
16  
17 41 25. Department of Mental Health, Johns Hopkins Bloomberg School of Public Health, Baltimore,  
18 42 MD, USA  
19  
20 43 26. University of Exeter Medical School, Exeter, UK  
21  
22  
23 44  
24  
25 45  
26  
27 46

28  
29 **Corresponding Author**

30 Harrison J Hansford

31  
32  
33 E: [h.hansford@unsw.edu.au](mailto:h.hansford@unsw.edu.au)

34 School of Health Sciences, UNSW Sydney,

35  
36  
37 2052, Sydney, Australia  
38  
39 52

40  
41 **Words: 2809**  
42  
43  
44 54  
45  
46  
47  
48  
49  
50  
51  
52  
53  
54  
55  
56  
57  
58  
59  
60

1  
2  
3  
4 55 **Abstract**  
5  
6

7 56

8  
9 57 **Background**  
10

11 58 Observational studies are increasingly being used to inform health decision-making  
12  
13  
14 59 when randomised trials are not feasible, ethical, or timely. The target trial approach  
15  
16  
17 60 provides a framework to help minimise common biases in observational studies that  
18  
19 61 aim to estimate the causal effect of interventions. Incomplete reporting of studies using  
20  
21  
22 62 the target trial framework limits the ability for clinicians, researchers, patients, and  
23  
24  
25 63 other decision-makers to appraise, synthesise, and interpret findings to inform clinical  
26  
27 64 and public health practice and policy. This paper describes the methods that we will  
28  
29  
30 65 use to develop the Transparent reporting of observational studies emulating a target  
31  
32 66 trial (TARGET) reporting guideline.  
33  
34

35 67

36  
37 68 **Methods/design**  
38

39  
40 69 The TARGET reporting guideline will be developed in five stages. The first stage will  
41  
42  
43 70 identify current target trial reporting practices by systematically reviewing published  
44  
45  
46 71 studies that explicitly emulated a target trial. The second stage will identify and refine  
47  
48  
49 72 items to be considered for inclusion in the TARGET guideline by consulting content  
50  
51  
52 73 experts using two online surveys. The third stage will prioritise and consolidate key  
53  
54  
55 74 items to be included in the TARGET guideline at a consensus meeting of TARGET  
56  
57  
58 75 investigators. The fourth stage will produce and pilot-test the TARGET guideline and  
59  
60

1  
2  
3  
4 76 explanation and elaboration document. The fifth stage will disseminate the TARGET  
5  
6 77 guideline and resources via journals, conferences, and courses.  
7  
8

9 78

## 10 11 79 **Ethics and Dissemination**

12  
13  
14 80 Ethical approval for the survey to be conducted has been attained (HC220536). The  
15  
16 81 TARGET guideline will be disseminated widely and should improve the transparency  
17  
18  
19 82 and completeness of reporting in studies using the target trial framework.  
20  
21

22 83

23  
24 84 **Key words:** target trial emulation, causal inference, reporting guideline, observational  
25  
26  
27 85 studies  
28  
29

30 86

## 31 32 87 **Strengths and Limitations**

- 33  
34  
35 88 - The TARGET reporting guideline will be developed according to  
36  
37 89 recommendations for health research reporting guidelines  
38  
39  
40 90 - The TARGET working group has been established to include stakeholders from  
41  
42  
43 91 a variety of backgrounds  
44

45 92  
46  
47  
48  
49  
50  
51  
52  
53  
54  
55  
56  
57  
58  
59  
60

## 93 Introduction

94 Observational studies can provide evidence on the causal effects of interventions  
95 when it is not feasible, ethical, or timely to conduct a relevant randomised trial.

96 However, making causal inferences from observational data is challenging due to  
97 confounding and design-related biases such as selection bias and immortal time bias.

98 <sup>1 2</sup> Design-related biases can be avoided using the target trial framework. <sup>3 4</sup> The  
99 framework involves the specification of the hypothetical randomised pragmatic trial —  
100 the target trial — that would ideally be conducted and how this trial might be emulated  
101 using observational data. <sup>3 4</sup> The two stages of the target trial framework are 1)  
102 specification of the target trial, and 2) emulation of the target trial. <sup>3 4</sup> Using  
103 observational data to mimic a randomised experiment was proposed in the mid 20<sup>th</sup>  
104 century, <sup>5-8</sup> and extended to time-varying treatments by Robins in 1986. <sup>9</sup>

105  
106 The value of using the target trial framework to design the analysis of observational  
107 studies has been recognised by international regulatory bodies in the field of medicine  
108 and health, <sup>10-14</sup> and the framework underpins the widely-used ROBINS-I tool for  
109 assessing risk of bias in non-randomised studies of interventions. <sup>15</sup> Studies that are  
110 explicit in using the target trial framework have been published with increasing  
111 frequency in leading general medical and specialty journals. <sup>16-21</sup>

112  
113 Application of the target trial framework requires the complete specification of the  
114 target trial protocol and its emulation (Figure 1). <sup>3</sup> Hernán & Robins <sup>3</sup> provide a



1  
2  
3  
4 115 template for specifying a target trial and its emulation; however, there is currently no  
5  
6 116 detailed guidance on reporting a study designed to emulate a target trial. Incomplete  
7  
8  
9 117 reporting of these studies limits the ability of clinicians, researchers, patients, and other  
10  
11 118 decision-makers to appraise and synthesise findings or interpret them to inform clinical  
12  
13  
14 119 and public health practice and policy. A reporting guideline that expands upon the  
15  
16 120 initial target trial emulation template<sup>3</sup> is needed to provide authors with comprehensive  
17  
18 121 recommendations on how to completely and transparently report a study emulating a  
19  
20  
21  
22 122 target trial.

123

124

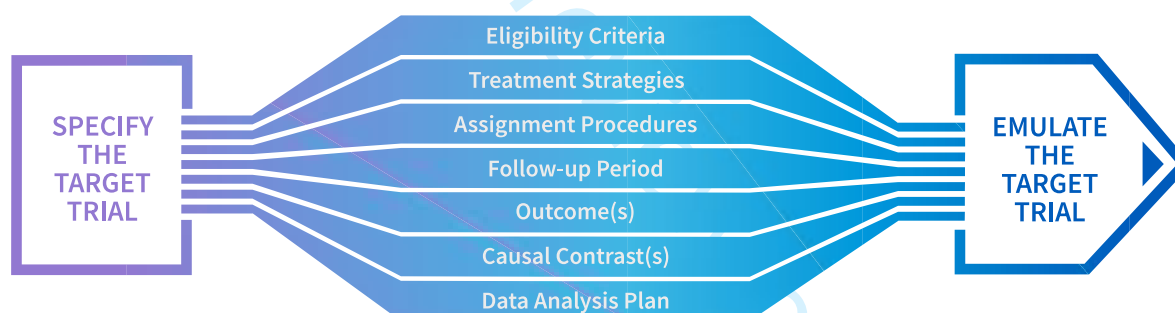

125

126 **Figure 1.** Elements relevant to both the specification and emulation of the target trial  
127 described by Hernán & Robins (3)

128

129 To address this gap, we outline the processes and methods that used to develop a  
130 reporting guideline for studies emulating a target trial – TARGET (Transparent  
131 reporting of observational studies emulating a target trial).

132

1  
2  
3  
4 133 **Objective**

5  
6 134 The objective of the TARGET guideline is to provide guidance on the minimum set of  
7  
8  
9 135 items that should be reported to provide a clear and transparent account of  
10  
11 136 observational studies that investigate the comparative effectiveness and safety of  
12  
13  
14 137 health interventions explicitly using the target trial framework.  
15

16  
17 138

18  
19 139 **Methods/design**

20  
21  
22 140 We will develop the TARGET Guideline in five stages following recommendations for  
23  
24 141 the development of health research reporting guidelines (Figure 2).<sup>22</sup>  
25  
26  
27  
28  
29  
30  
31  
32  
33  
34  
35  
36  
37  
38  
39  
40  
41  
42  
43  
44  
45  
46  
47  
48  
49  
50  
51  
52  
53  
54  
55  
56  
57  
58  
59  
60

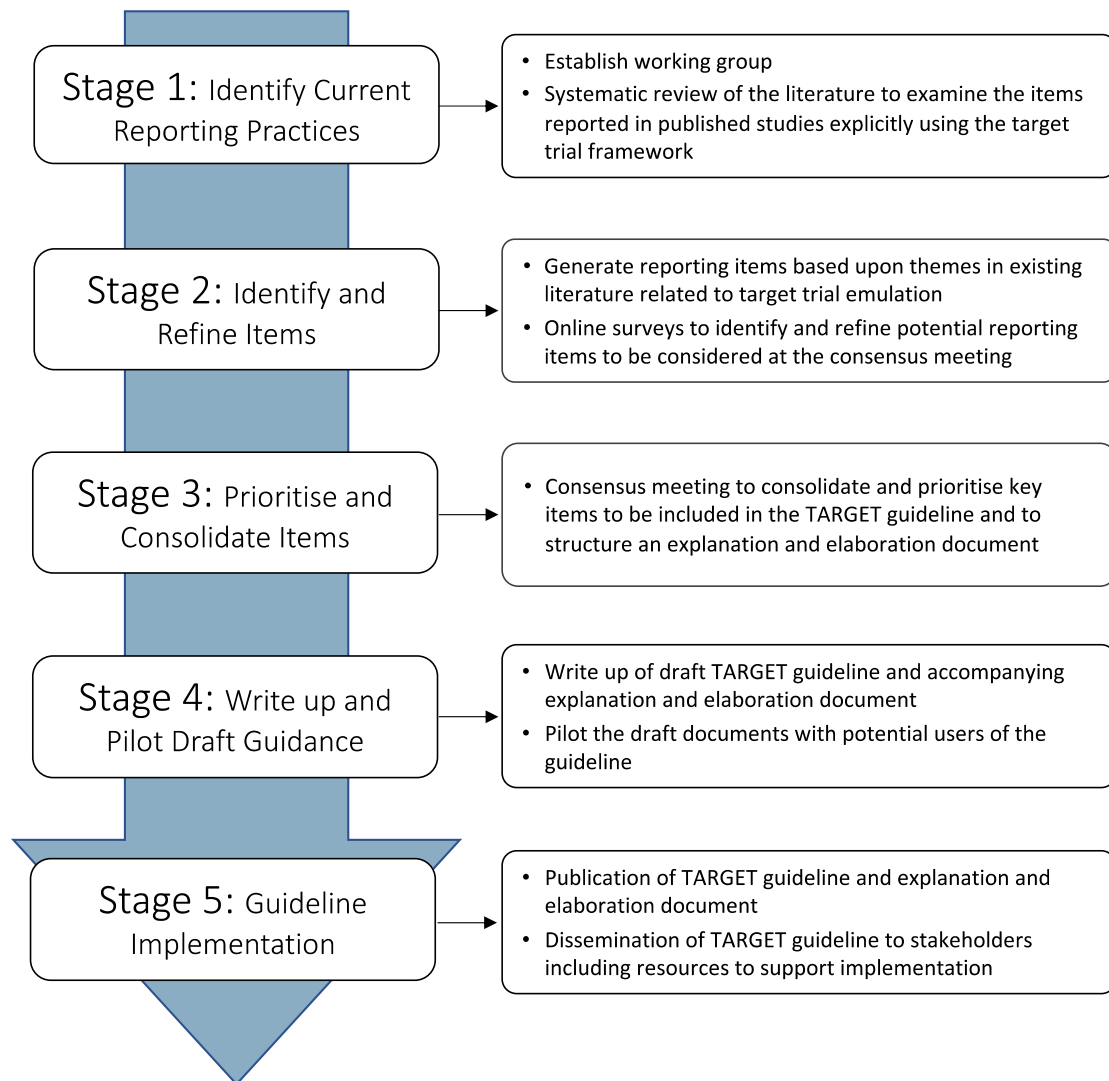

142 **Figure 2.** Workflow for the development of the TARGET guideline

143

#### 144 **TARGET working group**

145 The TARGET working group is made up of the steering committee and project team  
 146 (Supplementary Material 1). The group was established to collate expertise on target  
 147 trial emulation methodology, epidemiology, clinical trials, biostatistics, reporting  
 148 guideline development, and knowledge of regulatory and journal editorial processes.  
 149 The working group will oversee recruitment of participants for Stages 2 and 3 and  
 150 contribute to writing and disseminating the guideline documents.

151

**Stage 1: Identify current reporting practices**

The systematic review aims to assess whether and how important items are reported by published studies explicitly emulating a target trial and whether reporting guidance (e.g., STROBE<sup>23</sup>) was used. The protocol for this systematic review was registered on the Open Science Framework on 13 March 2022 (osf.io/uj56m).

157

*Databases, eligibility, and search terms*

We will search Medline, EMBASE, PsycINFO and Science Citation Index for observational studies that stated in their methods that they explicitly emulated a target trial. We will exclude studies not written in English, not in the field of medicine and health, not conducted in humans, or not observational designs. Many observational studies may implicitly use the framework of a randomised trial. However, to be included in this review studies must be explicit in their attempt to emulate a target trial (e.g., stated 'target trial emulation' in the article). To identify eligible studies, we developed a literature search in collaboration with an expert librarian at the University of Oxford. Our approach used sensitive search terms including emulat\*, target trial, observational data, real-world data, comparative effectiveness, and causal inference, to try to capture all papers explicitly emulating a target trial. The complete search strategy is in Supplementary Material 2. In duplicate, independent reviewers will conduct title, abstract, and full text screening. We will resolve disagreements between reviewers through discussion.

173

### 174 *Data Extraction*

175 We will extract items regarded by the steering committee as potentially important for  
176 the reporting of a target trial emulation, including those outlined by Hernán and Robins,  
177 2016.<sup>3</sup> Two independent reviewers will extract information on study authors, year of  
178 publication, journal, sub-field of medicine, study design, sample size, intervention,  
179 comparison group, outcomes assessed, and whether the study was prospectively  
180 registered. We will extract items relevant to the methods and results of the target trial  
181 emulation, including whether and how all components of the protocol of the proposed  
182 target trial, and how they were emulated, were specified (i.e., eligibility criteria,  
183 treatment strategies, assignment procedures, follow-up period, outcome(s), causal  
184 contrast(s), and data analysis plan). We will enter data into a standardised data  
185 extraction form which two authors will pilot with a selection of included studies. We will  
186 resolve disagreements in data extraction between reviewers through discussion, or  
187 where necessary, consultation with a third reviewer.

188

### 189 *Data analysis*

190 We will use R<sup>24</sup> for all data analyses. Categorical variables will be summarised using  
191 frequencies and percentages. Continuous variables will be summarised using mean  
192 and standard deviation, or median and interquartile range, as appropriate.

193

### 194 *Outcomes of the systematic review*

1  
2  
3  
4 195 The systematic review will provide evidence on reporting in studies explicitly emulating  
5  
6 196 a target trial. The findings will inform the online surveys (Stage 2) and the consensus  
7  
8  
9 197 meeting (Stage 3). We will submit the findings of this review for publication and all data  
10  
11 198 and code made publicly available.  
12

13  
14 199

## 16 200 **Stage 2: Identify and refine items for the TARGET guideline**

17  
18  
19 201 We will conduct two online surveys to generate a list of candidate items that add detail  
20  
21  
22 202 to each of the protocol elements in Figure 1.  
23

24 203

### 26 204 *Ethics*

27  
28  
29 205 Ethical approval has been obtained for the online surveys from the University of New  
30  
31  
32 206 South Wales Human Research Ethics Committee (HC220536).  
33

34  
35 207

### 36 208 *Selection of initial items*

37  
38  
39 209 The steering group will develop a list of key items, informed by the systematic review  
40  
41  
42 210 (Stage 1), and the target trial framework described by Hernán & Robins (3), thought  
43  
44  
45 211 important for the conduct and reporting target trial emulations (Figure 1). Other  
46  
47  
48 212 potential sources of items include: published guidance for observational studies and  
49  
50  
51 213 randomised controlled trials, the ROBINS-I tool, <sup>15</sup> and studies that describe items that  
52  
53 214 may be important for the conduct or reporting of target trial emulations.  
54

55 215

### 56 216 *Participants*

1  
2  
3  
4 217 Members of the TARGET working group (Supplementary Material 1) will be invited to  
5  
6 218 participate in the surveys.  
7

8  
9 219

10  
11 220 *Procedure*  
12

13  
14 221 We will host two online surveys using REDCap.<sup>25 26</sup> We will send each online survey  
15  
16 222 via email to the participants. We will ask participants to rate the importance of each  
17  
18 223 potential reporting item on a 9-point Likert scale (1, “not important”, to 9, “critically  
19  
20 224 important”). Participants will have the opportunity to provide suggestions or  
21  
22 225 modifications to the wording of items as well as suggest additional items or make other  
23  
24 226 comments.  
25  
26  
27  
28

29  
30 227

31  
32 228 In the second survey, we will send participants a summary of the results for each  
33  
34 229 potential reporting item (mean scores and standard deviations, median scores and  
35  
36 230 interquartile ranges, and histograms), their own score for each item, and any  
37  
38 231 comments from participants on each item from the first survey. We will also present  
39  
40 232 any new items and suggested modifications to items. We will then invite participants  
41  
42 233 to re-score the importance of each item, and score any additional items, considering  
43  
44 234 the aggregated ratings. Participants will have the opportunity to provide additional  
45  
46 235 feedback on each item in the form of open ended responses.  
47  
48  
49  
50

51  
52  
53 236

54  
55 237 *Analysis*  
56  
57  
58  
59  
60

1  
2  
3  
4 238 Continuous variables will be summarised using mean and standard deviation, and  
5  
6 239 median and interquartile range. We will analyse the free-text responses from the first  
7  
8  
9 240 and second surveys using an inductive approach, in which we will use reflexive  
10  
11 241 thematic analysis to identify, organise and generate codes, and then identify themes  
12  
13  
14 242 found within the dataset. These data will contribute to the creation of new items and  
15  
16 243 modification of existing items to be included in the subsequent survey.  
17  
18

19 244

#### 22 245 *Outcome of the online surveys*

23  
24 246 We will generate a preliminary list of items with corresponding ratings of importance  
25  
26  
27 247 to be considered in the TARGET guideline at the consensus meeting (Stage 3). We  
28  
29  
30 248 will also generate qualitative insights to guide item refinement and prioritisation in  
31  
32 249 preparation for the consensus meeting.  
33  
34

35 250

#### 37 251 **Stage 3 – Consolidate and prioritise key items to be included in the TARGET guideline**

38  
39  
40 252 A consensus meeting will finalise reporting items for the TARGET guideline.<sup>22</sup> The  
41  
42  
43 253 consensus meeting will follow suggested methods for developing reporting guidelines  
44  
45 254 <sup>22</sup>, including guidance for consensus-based methods currently being developed which  
46  
47  
48 255 we will use if they become available.<sup>27</sup>  
49

50 256

#### 53 257 *Process*

54  
55  
56 258 We will invite stakeholders identified by the working group to participate in a two-day  
57  
58 259 consensus meeting. The TARGET working group will ensure that the expertise of  
59  
60



1  
2  
3  
4 260 consensus meeting participants includes target trial emulation methodology,  
5  
6 261 epidemiology, clinical trials, biostatistics, reporting guideline development, and  
7  
8  
9 262 regulatory and journal editorial processes. Prior to the consensus meeting, the core  
10  
11 263 team will provide attendees with evidence from the systematic review (Stage 1) and  
12  
13  
14 264 findings from the online surveys (Stage 2) including a draft of the items proposed for  
15  
16 265 inclusion in the guideline. We will present the findings from Stage 1 and 2 at the  
17  
18  
19 266 consensus meeting. A member of the TARGET working group will facilitate a  
20  
21  
22 267 structured discussion on the rationale for including items from the online surveys. If  
23  
24  
25 268 there are disagreements, they will first be debated and, if disagreements remain, we  
26  
27 269 will hold an anonymised vote to establish the importance of including the item in the  
28  
29  
30 270 guideline. For the anonymised vote, a simple majority will be sufficient to guide the  
31  
32 271 inclusion/exclusion of an item. The meeting will conclude with discussion about the  
33  
34  
35 272 content and production of relevant documents (TARGET guideline, draft explanation  
36  
37 273 and elaboration document) as well as strategies for dissemination and implementation.  
38  
39  
40 274 Following the conclusion of the consensus meeting, we will circulate a report on the  
41  
42  
43 275 outcome to the meeting participants for review and approval.  
44

45 276

47  
48 277 **Stage 4 – Development and piloting of the draft TARGET guideline and explanation**  
49  
50 278 **and elaboration document**

51  
52  
53 279 Stage 4 involves drafting the TARGET guideline and accompanying explanation and  
54  
55  
56 280 elaboration document to ensure that the wording and content of the documents are  
57  
58 281 clear, precise, and suitable for all identified stakeholders. The purpose of the  
59  
60

1  
2  
3  
4 282 explanation and elaboration document is to explain each item by providing background  
5  
6 283 information, a rationale, and clear reporting examples from published target trial  
7  
8  
9 284 emulations. We will design the explanation and elaboration document to facilitate  
10  
11 285 adherence to the TARGET guideline by clarifying the importance of each item,  
12  
13  
14 286 highlighting relevant reporting issues and providing examples to assist authors using  
15  
16 287 the guideline. The consensus meeting participants may be asked to review and  
17  
18  
19 288 comment on the draft TARGET guideline and explanation and elaboration document.  
20  
21

22 289  
23  
24 290 We will evaluate the TARGET guideline by piloting the proposed guideline and the  
25  
26  
27 291 explanation and elaboration document with 20-30 expert methodologists and potential  
28  
29  
30 292 users of TARGET, identified from TARGET working group networks. We will ask  
31  
32 293 participants to provide general feedback on accessibility and usability, and to identify  
33  
34  
35 294 possible reporting items that might have been overlooked. We will also ask for specific  
36  
37 295 feedback about the utility and clarity of each TARGET item. We will collect data  
38  
39  
40 296 through online surveys, hosted by REDCap. <sup>25</sup> <sup>26</sup> We will incorporate feedback from  
41  
42  
43 297 the piloting exercise into the final guideline and explanation and elaboration document,  
44  
45 298 as required. If suggested revisions are extensive, we will conduct a further round of  
46  
47  
48 299 piloting.

49  
50 300

### 51 52 53 301 **Stage 5 – Guideline implementation**

54  
55 302 The goal of the final stage of guideline development is to maximise reach and use of  
56  
57  
58 303 the TARGET guideline. The TARGET working group will guide the dissemination  
59  
60

1  
2  
3  
4 304 strategy with advice from consensus meeting participants. We aim to publish the  
5  
6 305 TARGET guideline and the explanation and elaboration document and disseminate  
7  
8  
9 306 the findings through traditional and social media. We will engage journal editors and  
10  
11 307 funding agencies to encourage TARGET guideline endorsement alongside other  
12  
13  
14 308 published reporting guidance. We will publicly host the TARGET guideline and  
15  
16 309 explanation and elaboration paper, and any other relevant material on a TARGET  
17  
18  
19 310 website. We will index the guideline on the Enhancing the QUALity and Transparency  
20  
21  
22 311 Of health Research (EQUATOR) Network website.<sup>28 29</sup> We will create online  
23  
24 312 resources including infographics, blog posts and podcasts, which will be available on  
25  
26  
27 313 the TARGET website. We will share the TARGET guideline with authors in the field,  
28  
29  
30 314 and at relevant scientific conferences and methodological courses.

31  
32  
33  
34  
35 316

## 316 Discussion

36  
37 317 Studies that explicitly aim to emulate a target trial are increasingly published in the  
38  
39  
40 318 medical literature and are used to inform practice and policy decisions. A reporting  
41  
42  
43 319 guideline for these studies will facilitate comprehensive and transparent reporting and  
44  
45 320 support accurate appraisal and implementation of study findings by researchers,  
46  
47  
48 321 clinicians, patients, and other decision-makers.

49  
50  
51 322

52  
53 323 The TARGET guideline and supporting guidance material aim to improve the  
54  
55  
56 324 completeness and transparency of reporting of observational studies that aim to  
57  
58  
59 325 explicitly emulate a target trial in medical and health research. Although the focus is  
60

1  
2  
3  
4 326 on studies that explicitly use the target trial emulation framework much of the guidance  
5  
6 327 will be applicable to studies using non-experimental comparison group designs to  
7  
8  
9 328 estimate causal effects. We will develop the TARGET guideline following accepted  
10  
11 329 recommendations for the development of health research reporting guidelines to  
12  
13  
14 330 maximise the guidelines usefulness and usage. <sup>22</sup> We plan to use a structured  
15  
16 331 dissemination approach to maximise uptake of the TARGET guideline and will ensure  
17  
18  
19 332 that the guideline is freely and easily accessible.  
20  
21  
22  
23  
24  
25  
26  
27  
28  
29  
30  
31  
32  
33  
34  
35  
36  
37  
38  
39  
40  
41  
42  
43  
44  
45  
46  
47  
48  
49  
50  
51  
52  
53  
54  
55  
56  
57  
58  
59  
60

1  
2  
3  
4 333 **Declarations**

5  
6 334

7  
8  
9 335 **Ethics approval and consent to participate**

10  
11 336 Not Applicable

12  
13  
14 337

15  
16 338 **Consent for publication**

17  
18  
19 339 All authors consent to publication of this manuscript

20  
21  
22 340

23  
24 341 **Availability of data and materials**

25  
26  
27 342 Not applicable

28  
29  
30 343

31  
32 344 **Funding**

33  
34  
35 345 There was no specific funding for this study. HJH was supported by an Australian

36  
37 346 National Health and Medical Research Council (NHMRC) Postgraduate Scholarship,

38  
39  
40 347 a PhD Top-Up Scholarship from Neuroscience Research Australia, and was a

41  
42 348 Neuroscience Research Australia PhD Pearl sponsored by Paul Salteri AO. AGC

43  
44  
45 349 was supported by an Australian NHMRC Investigator Grant (ID 2010088). MM-B was

46  
47  
48 350 supported by an Australian NHMRC Investigator Grant (ID 2009572). JM was

49  
50  
51 351 supported by an Australian NHMRC Investigator Grant (ID 2010128). BAD was

52  
53 352 supported by a grant from the National Institutes of Health (R00 CA248335). ME was

54  
55  
56 353 supported by grants from the National Institutes of Health (R01 AI152772-01, 5U01-

57  
58 354 AI069924-05) and the Swiss National Science Foundation (32FP30-174281). NI was

59  
60

1  
2  
3  
4 355 supported by grants from the National Institute for Health and Care Research  
5  
6 356 (HDRUK2022.0313) and the UK Office for National Statistics (2002563). MAH was  
7  
8  
9 357 supported by NIH grant R37 AI102634.  
10

11 358

### 14 359 **Competing interests**

16 360 All authors declare no competing interests.

19 361

### 22 362 **Author Contributions**

24 363 HJH, AGC, MDJ, HL, JHM, conceived the idea for the project protocol. All authors  
25  
26  
27 364 contributed to the design and methodology of the project protocol. HJH and AGC wrote  
28  
29  
30 365 the first draft of the manuscript. All authors provided feedback, revised the manuscript  
31  
32 366 and have read and approved the final version.  
33

35 367

### 37 368 **Acknowledgements**

40 369 We acknowledge Nia Roberts, outreach librarian and information specialist at the  
41  
42  
43 370 University of Oxford for assistance designing the literature search.  
44

45 371

### 48 372 **Article Summary**

### 50 373 **Strengths and Limitations**

53 374

56 375

1  
2  
3  
4  
5  
6  
7  
8  
9  
10  
11  
12  
13  
14  
15  
16  
17  
18  
19  
20  
21  
22  
23  
24  
25  
26  
27  
28  
29  
30  
31  
32  
33  
34  
35  
36  
37  
38  
39  
40  
41  
42  
43  
44  
45  
46  
47  
48  
49  
50  
51  
52  
53  
54  
55  
56  
57  
58  
59  
60

376 **Abbreviations**

377

378 **EQUATOR:** Enhancing the QUALity and Transparency Of health Research

379 **REDCap:** Research Electronic Data Capture

380 **STROBE:** Strengthening the Reporting of Observational Studies in Epidemiology

381 **TARGET:** TrAnsparent ReportinG of studies Emulating a Target trial

382

383

For peer review only

384 **References**

- 385 1. Hernán MA, Sauer BC, Hernández-Díaz S, et al. Specifying a target trial prevents immortal  
386 time bias and other self-inflicted injuries in observational analyses. *J Clin Epidemiol*  
387 2016;79:70-75. doi: 10.1016/j.jclinepi.2016.04.014 [published Online First:  
388 2016/05/31]
- 389 2. Dickerman BA, García-Albéniz X, Logan RW, et al. Avoidable flaws in observational  
390 analyses: an application to statins and cancer. *Nature Medicine* 2019;25(10):1601-  
391 06. doi: 10.1038/s41591-019-0597-x
- 392 3. Hernán MA, Robins JM. Using big data to emulate a target trial when a randomized trial is  
393 not available. *American journal of epidemiology* 2016;183(8):758-64.
- 394 4. Hernán MA. Methods of public health research—strengthening causal inference from  
395 observational data. *New England Journal of Medicine* 2021;385(15):1345-48.
- 396 5. Cochran WG. Observational studies. *Statistical papers in honor of George W Snedecor*  
397 1972:77-90.
- 398 6. Dorn HF. Philosophy of inferences from retrospective studies. *American Journal of Public*  
399 *Health and the Nations Health* 1953;43(6\_Pt\_1):677-83.
- 400 7. Rubin DB. Estimating causal effects of treatments in randomized and nonrandomized  
401 studies. *Journal of educational Psychology* 1974;66(5):688.
- 402 8. Wold H. Causality and econometrics. *Econometrica: Journal of the Econometric Society*  
403 1954:162-77.
- 404 9. Robins J. A new approach to causal inference in mortality studies with a sustained  
405 exposure period—application to control of the healthy worker survivor effect.  
406 *Mathematical modelling* 1986;7(9-12):1393-512.
- 407 10. Concato J, Stein P, Dal Pan GJ, et al. Randomized, observational, interventional, and  
408 real-world—What's in a name? *Pharmacoepidemiology and drug safety*  
409 2020;29(11):1514-17.
- 410 11. Agency EM. European medicines agencies network strategy to 2025. The Netherlands:  
411 Health of Medicines Agencies, 2020.
- 412 12. National Institute for Health and Care Excellence. The NICE strategy 2021 to 2026, 2021.
- 413 13. Health Canada. Optimizing the Use of Real World Evidence to Inform Regulatory  
414 Decision-Making: Government of Canada, 2019.
- 415 14. Therapeutic Goods Administration. Real world evidence and patient reported outcomes  
416 in the regulatory context. [https://www.tga.gov.au/review-real-world-evidence-and-](https://www.tga.gov.au/review-real-world-evidence-and-patient-reported-outcomes)  
417 [patient-reported-outcomes](https://www.tga.gov.au/review-real-world-evidence-and-patient-reported-outcomes): Australian Government, Department of Health, 2021.
- 418 15. Sterne JA, Hernán MA, Reeves BC, et al. ROBINS-I: a tool for assessing risk of bias in non-  
419 randomised studies of interventions. *BMJ* 2016;355:i4919. doi: 10.1136/bmj.i4919
- 420 16. Garcia-Albeniz XH, J.: Bretthauer, M.: Hernan, M. A. Effectiveness of screening  
421 colonoscopy to prevent colorectal cancer among medicare beneficiaries aged 70 to  
422 79 years: A prospective observational study. *Annals of Internal Medicine* 2017 doi:  
423 <http://dx.doi.org/10.7326/M16-0758>
- 424 17. Mahévas M, Tran V-T, Roumier M, et al. Clinical efficacy of hydroxychloroquine in  
425 patients with covid-19 pneumonia who require oxygen: observational comparative  
426 study using routine care data. *BMJ* 2020;369:m1844. doi: 10.1136/bmj.m1844
- 427 18. Kaura A, Sterne JAC, Trickey A, et al. Invasive versus non-invasive management of older  
428 patients with non-ST elevation myocardial infarction (SENIOR-NSTEMI): a cohort



- 1  
2  
3 429 study based on routine clinical data. *The Lancet* 2020;396(10251):623-34. doi:  
4 430 10.1016/S0140-6736(20)30930-2  
5  
6 431 19. Emilsson L, García-Albéniz X, Logan RW, et al. Examining Bias in Studies of Statin  
7 432 Treatment and Survival in Patients With Cancer. *JAMA Oncol* 2018;4(1):63-70. doi:  
8 433 10.1001/jamaoncol.2017.2752  
9  
10 434 20. Chan You S, Krumholz HM, Suchard MA, et al. Comprehensive Comparative Effectiveness  
11 435 and Safety of First-Line  $\beta$ -Blocker Monotherapy in Hypertensive Patients: A Large-  
12 436 Scale Multicenter Observational Study. *Hypertension* 2021;77(5):1528-38. doi:  
13 437 10.1161/hypertensionaha.120.16402 [published Online First: 20210329]  
14 438 21. Caniglia EC, Robins JM, Cain LE, et al. Emulating a trial of joint dynamic strategies: An  
15 439 application to monitoring and treatment of HIV-positive individuals. *Stat Med*  
16 440 2019;38(13):2428-46. doi: 10.1002/sim.8120 [published Online First: 20190318]  
17  
18 441 22. Moher D, Schulz KF, Simera I, et al. Guidance for developers of health research reporting  
19 442 guidelines. *PLoS medicine* 2010;7(2):e1000217.  
20  
21 443 23. Von Elm E, Altman DG, Egger M, et al. The Strengthening the Reporting of Observational  
22 444 Studies in Epidemiology (STROBE) statement: guidelines for reporting observational  
23 445 studies. *Bulletin of the World Health Organization* 2007;85:867-72.  
24 446 24. R Core Team. R: A language and environment for statistical computing. 2013  
25 447 25. Harris PA, Taylor R, Minor BL, et al. The REDCap consortium: Building an international  
26 448 community of software platform partners. *Journal of Biomedical Informatics*  
27 449 2019;95:103208. doi: <https://doi.org/10.1016/j.jbi.2019.103208>  
28  
29 450 26. Harris PA, Taylor R, Thielke R, et al. Research electronic data capture (REDCap)—A  
30 451 metadata-driven methodology and workflow process for providing translational  
31 452 research informatics support. *Journal of Biomedical Informatics* 2009;42(2):377-81.  
32 453 doi: <https://doi.org/10.1016/j.jbi.2008.08.010>  
33  
34 454 27. Gattrell WT, Hungin AP, Price A, et al. ACCORD guideline for reporting consensus-based  
35 455 methods in biomedical research and clinical practice: a study protocol. *Research*  
36 456 *Integrity and Peer Review* 2022;7(1):3. doi: 10.1186/s41073-022-00122-0  
37 457 28. The EQUATOR Network. EQUATOR Network - Enhancing the QUALity and Transparency  
38 458 Of health Research 2022 [Available from: <https://www.equator-network.org/2022>.  
39 459 29. Simera I, Moher D, Hoey J, et al. A catalogue of reporting guidelines for health research.  
40 460 *European journal of clinical investigation* 2010;40(1):35-53.  
41 461  
42  
43  
44  
45 462

1  
2  
3  
4 463 **Supplementary Material**  
5  
6  
7

8  
9  
10  
11  
12 464

13 465 **Supplementary Material 1: TARGET working group members (alphabetical)**  
14

15  
16  
17 466

18 467 *Steering committee*

19 468 Dr Aidan G. Cashin

20 469 Mr Harrison J. Hansford

21 470 Prof Miguel A. Hernán

22 471 Dr Hopin Lee

23 472 Dr Matthew D. Jones

24 473 Prof James H. McAuley

25 474 A/Prof Sonja A. Swanson

26  
27 475

28  
29 476 *Project team*

30 477 A/Prof Issa J. Dahabreh

31 478 A/Prof Barbra A. Dickerman

32 479 Prof Matthias Egger

33 480 Dr Xabier Garcia-Albeniz

34 481 Prof Robert M. Golub

35 482 A/Prof Nazrul Islam

36 483 A/Prof Sara Lodi

37 484 A/Prof Margarita Moreno-Betancur

38 485 Prof Sallie A. Pearson

39 486 Prof Sebastian Schneeweiss

40 487 Prof Jonathan A. C. Sterne

41 488 Dr Melissa K. Sharp

42 489 Prof Elizabeth A. Stuart

43  
44  
45 490

46  
47  
48 491  
49  
50  
51  
52  
53  
54  
55  
56  
57  
58  
59  
60

1  
2  
3  
4 492 **Supplementary Material 2: Complete search strategies for all databases**

5  
6 493

7  
8 494 **Medline**

9  
10 495 1 (emulat\* adj5 trial?).mp.

11  
12 496 2 (target adj (trial? or experiment?)).mp.

13  
14 497 3. (observational adj (stud\* or research or data)).mp.

15  
16 498 4. ((real world or rwd) adj2 (stud\* or research or data)).mp.

17  
18 499 5. (routine\* adj2 data).mp.

19  
20 500 6. (comparative effectiveness adj2 (stud\* or research or data)).mp.

21  
22 501 7. (emulat\* or propensity score? or (causal adj2 (inference? or analys?s or  
23 effect\*))).mp.

24  
25 502 8. 3 or 4 or 5 or 6 or 7

26  
27 503 9. 2 and 8

28  
29 504 10. (target adj (trial? or experiment?)).ti.

30  
31 505 11. 1 or 9 or 10

32  
33 506 Filtered for time (2012-2022) manually after search

34  
35 507

36  
37 508  
38 509 **Embase**

39  
40 510 1. (emulat\* adj5 trial?).mp.

41  
42 511 2. (target adj (trial? or experiment?)).mp.

43  
44 512 3. (observational adj (stud\* or research or data)).mp.

45  
46 513 4. ((real world or rwd) adj2 (stud\* or research or data)).mp.

47  
48 514 5. (routine\* adj2 data).mp.

49  
50 515 6. (comparative effectiveness adj2 (stud\* or research or data)).mp.

51  
52 516 7. (emulat\* or propensity score? or (causal adj2 (inference? or analys?s or  
53 effect\*))).mp.

54  
55 517 8. 3 or 4 or 5 or 6 or 7

56  
57 518 9. 2 and 8

58  
59 519

1  
2  
3  
4 520 10. (target adj (trial? or experiment?)).ti.

5  
6 521 11. 1 or 9 or 10

7  
8 522

9  
10 523 psycINFO

11 524 noft(target trial emulat\*) OR ((noft(real world data) OR (noft(emulat\* trial)) OR

12  
13 525 noft(observational) OR noft(routine\* data)) AND noft(comparative effective\*)

14  
15 526 AND noft(causal infer\*))

16  
17 527

18  
19 528 Web of Science

20  
21 529 (TI=(emulat\* trial)) OR (TI=(real world data) OR TI=(routine\* data) OR

22  
23 530 TI=(comparative effectiveness study comparative effectiveness research or

24  
25 531 comparative effectiveness data) OR (TI=(emulat\* or propensity score?) AND

26  
27 532 TI=(causal inference or causal analysis or causal effect\*)) AND ALL=(target

28  
29 533 trial or emulat\* or target trial emulation)

1  
2  
3  
4  
5  
6  
7  
8  
9  
10  
11  
12  
13  
14  
15

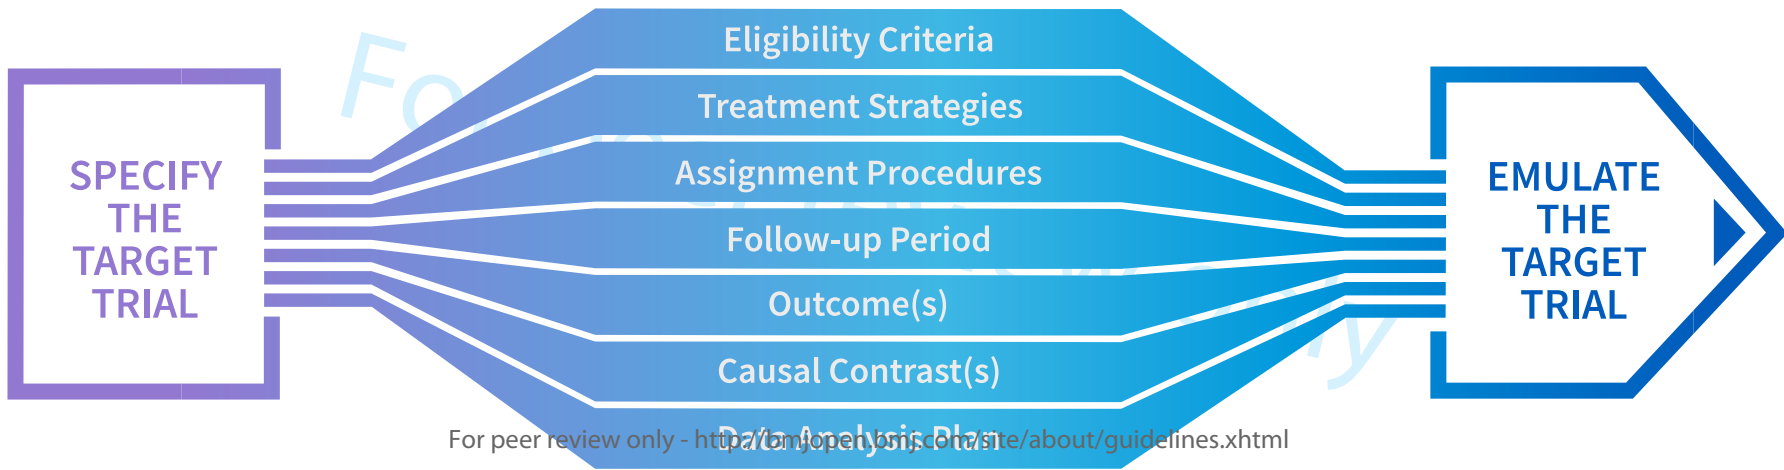

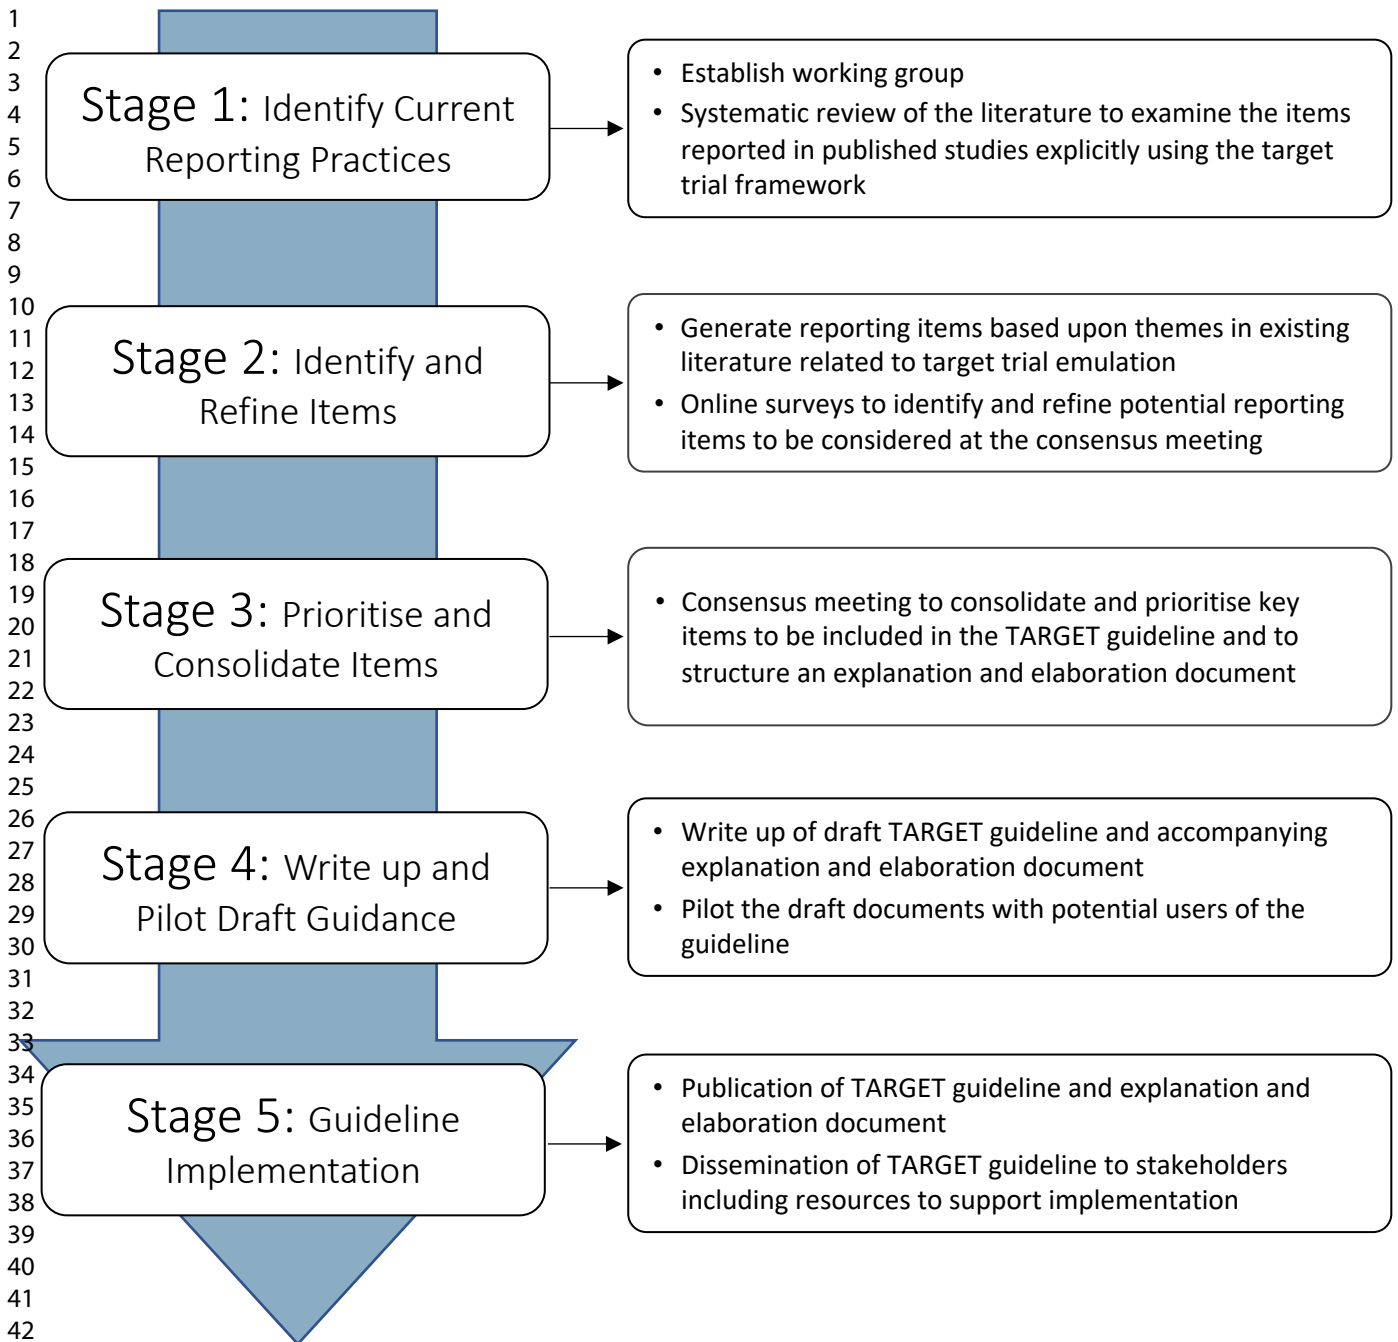

# BMJ Open

## Development of the Transparent Reporting of Observational Studies Emulating a Target Trial (TARGET) Guideline

|                               |                                                                                                                                                                                                                                                                                                                                                                                                                                                                                                                                                                                                                                                                                                                                                                                                                                                                                                                                                                                                                                                                                                                                                                                                                                                                                                                                                                                                                                                                                                                                                                                                                                                                                                                                                                                                                                                                                                                                                                                                                                                                                                                                                                                                                                                                                                                                                                                                                                                        |
|-------------------------------|--------------------------------------------------------------------------------------------------------------------------------------------------------------------------------------------------------------------------------------------------------------------------------------------------------------------------------------------------------------------------------------------------------------------------------------------------------------------------------------------------------------------------------------------------------------------------------------------------------------------------------------------------------------------------------------------------------------------------------------------------------------------------------------------------------------------------------------------------------------------------------------------------------------------------------------------------------------------------------------------------------------------------------------------------------------------------------------------------------------------------------------------------------------------------------------------------------------------------------------------------------------------------------------------------------------------------------------------------------------------------------------------------------------------------------------------------------------------------------------------------------------------------------------------------------------------------------------------------------------------------------------------------------------------------------------------------------------------------------------------------------------------------------------------------------------------------------------------------------------------------------------------------------------------------------------------------------------------------------------------------------------------------------------------------------------------------------------------------------------------------------------------------------------------------------------------------------------------------------------------------------------------------------------------------------------------------------------------------------------------------------------------------------------------------------------------------------|
| Journal:                      | <i>BMJ Open</i>                                                                                                                                                                                                                                                                                                                                                                                                                                                                                                                                                                                                                                                                                                                                                                                                                                                                                                                                                                                                                                                                                                                                                                                                                                                                                                                                                                                                                                                                                                                                                                                                                                                                                                                                                                                                                                                                                                                                                                                                                                                                                                                                                                                                                                                                                                                                                                                                                                        |
| Manuscript ID                 | bmjopen-2023-074626.R1                                                                                                                                                                                                                                                                                                                                                                                                                                                                                                                                                                                                                                                                                                                                                                                                                                                                                                                                                                                                                                                                                                                                                                                                                                                                                                                                                                                                                                                                                                                                                                                                                                                                                                                                                                                                                                                                                                                                                                                                                                                                                                                                                                                                                                                                                                                                                                                                                                 |
| Article Type:                 | Protocol                                                                                                                                                                                                                                                                                                                                                                                                                                                                                                                                                                                                                                                                                                                                                                                                                                                                                                                                                                                                                                                                                                                                                                                                                                                                                                                                                                                                                                                                                                                                                                                                                                                                                                                                                                                                                                                                                                                                                                                                                                                                                                                                                                                                                                                                                                                                                                                                                                               |
| Date Submitted by the Author: | 26-Jul-2023                                                                                                                                                                                                                                                                                                                                                                                                                                                                                                                                                                                                                                                                                                                                                                                                                                                                                                                                                                                                                                                                                                                                                                                                                                                                                                                                                                                                                                                                                                                                                                                                                                                                                                                                                                                                                                                                                                                                                                                                                                                                                                                                                                                                                                                                                                                                                                                                                                            |
| Complete List of Authors:     | <p>Hansford, Harrison; University of New South Wales; Neuroscience Research Australia</p> <p>Cashin, Aidan; Neuroscience Research Australia, Centre for Pain IMPACT; University of New South Wales, School of Health Sciences, Faculty of Medicine and Health</p> <p>Jones, Matthew; University of New South Wales; Neuroscience Research Australia, Centre for Pain IMPACT</p> <p>Swanson, Sonja; University of Pittsburgh, Department of Epidemiology; Harvard T.H. Chan School of Public Health, CAUSALab, Department of Epidemiology</p> <p>Islam, Nazrul; University of Oxford, Big data institute; University of Southampton, Faculty of Medicine</p> <p>Dahabreh, Isa; , Beth Israel Deaconess Medical Center and Harvard Medical School, Richard A. and Susan F. Smith Center for Outcomes Research; Harvard T.H. Chan School of Public Health, CAUSALab, Department of Epidemiology, Department of Biostatistics</p> <p>Dickerman, Barbra; Harvard TH Chan School of Public Health, CAUSALab; Harvard TH Chan School of Public Health, Department of Epidemiology</p> <p>Egger, Matthias; University of Bern, Institute of Social &amp; Preventive Medicine; University of Cape Town Faculty of Health Sciences, Centre for Infectious Disease Epidemiology and Research</p> <p>Garcia-De-Albeniz, Xavier ; Harvard University T H Chan School of Public Health, CAUSALab; RTI Health Solutions Barcelona</p> <p>Golub, Robert ; Northwestern University Feinberg School of Medicine</p> <p>Lodi, Sara; Harvard TH Chan School of Public Health, CAUSALab; Boston University School of Public Health, Department of Biostatistics</p> <p>Moreno-Betancur , Margarita ; Murdoch Children's Research Institute, Melbourne, Clinical Epidemiology &amp; Biostatistics Unit; The University of Melbourne, Department of Paediatrics</p> <p>Pearson, Sallie-Anne; University of New South Wales, School of Population Health</p> <p>Schneeweiss , Sebastian ; Harvard Medical School, Boston, USA, Division of Pharmacoepidemiology, Department of Medicine, Brigham &amp; Women's Hospital,</p> <p>Sterne, Jonathan; University of Bristol, Department of Population Health Sciences; NIHR Bristol Biomedical Research Centre</p> <p>Sharp, Melissa; RCSI University of Medicine and Health Sciences, Department of General Practice</p> <p>Stuart, Elizabeth A; Johns Hopkins Bloomberg School of Public Health, Department of Mental Health</p> |

1  
2  
3  
4  
5  
6  
7  
8  
9  
10  
11  
12  
13  
14  
15  
16  
17  
18  
19  
20  
21  
22  
23  
24  
25  
26  
27  
28  
29  
30  
31  
32  
33  
34  
35  
36  
37  
38  
39  
40  
41  
42  
43  
44  
45  
46  
47  
48  
49  
50  
51  
52  
53  
54  
55  
56  
57  
58  
59  
60

|                                   |                                                                                                                                                                                                                                                                                                                                                                                 |
|-----------------------------------|---------------------------------------------------------------------------------------------------------------------------------------------------------------------------------------------------------------------------------------------------------------------------------------------------------------------------------------------------------------------------------|
|                                   | Hernan, M; Harvard School of Public Health, CAUSALab; Harvard T.H Chan School of Public Health, Department of Epidemiology, Department of Biostatistics<br>Lee, Hopin; University of Exeter Medical School<br>McAuley, James; University of New South Wales, School of Health Sciences, Faculty of Medicine and Health; Neuroscience Research Australia, Centre for Pain IMPACT |
| <b>Primary Subject Heading:</b>   | Epidemiology                                                                                                                                                                                                                                                                                                                                                                    |
| <b>Secondary Subject Heading:</b> | Research methods                                                                                                                                                                                                                                                                                                                                                                |
| <b>Keywords:</b>                  | EPIDEMIOLOGY, Retrospective Studies, STATISTICS & RESEARCH METHODS                                                                                                                                                                                                                                                                                                              |
|                                   |                                                                                                                                                                                                                                                                                                                                                                                 |

SCHOLARONE™  
Manuscripts



# 1 Development of the Transparent Reporting of Observational Studies Emulating a Target 2 Trial (TARGET) Guideline

3  
4 Harrison J. Hansford<sup>1,2</sup>, Aidan G. Cashin<sup>1,2</sup>, Matthew D. Jones<sup>1,2</sup>, Sonja A. Swanson<sup>3,8,9</sup>,  
5 Nazrul Islam<sup>5,6</sup>, Issa J. Dahabreh<sup>7,8,9,10</sup>, Barbra A. Dickerman<sup>8,9</sup>, Matthias Egger<sup>11,12,13</sup>,  
6 Xabier Garcia-Albeniz<sup>8,14</sup>, Robert M. Golub<sup>15</sup>, Sara Lodi<sup>8,16</sup>, Margarita Moreno-  
7 Betancur<sup>17,18</sup>, Sallie-Anne Pearson<sup>19</sup>, Sebastian Schneeweiss<sup>20</sup>, Jonathan A. C.  
8 Sterne<sup>21,22,23</sup>, Melissa K. Sharp<sup>24</sup>, Elizabeth A. Stuart<sup>25</sup>, Miguel A. Hernán<sup>8,9,10</sup>, Hopin  
9 Lee<sup>26</sup>, James H. McAuley<sup>1,2</sup>

10  
11 1. School of Health Sciences, Faculty of Medicine and Health, University of New South Wales,  
12 Sydney, Australia

13 2. Centre for Pain IMPACT, Neuroscience Research Australia, Sydney, Australia

14 3. Department of Epidemiology, University of Pittsburgh, Pittsburgh, United States of America

15 5. Oxford Population Health, Big Data Institute, University of Oxford, Oxford, UK

16 6. Faculty of Medicine, University of Southampton, Southampton, UK

17 7. Richard A. and Susan F. Smith Center for Outcomes Research, Beth Israel Deaconess  
18 Medical Center and Harvard Medical School, Boston, MA, USA

19 8. CAUSALab, Harvard T.H. Chan School of Public Health, Boston, MA, USA

20 9. Department of Epidemiology, Harvard T.H. Chan School of Public Health, Boston, MA, USA

21 10. Department of Biostatistics, Harvard T.H. Chan School of Public Health, Boston, MA, USA

22 11. Institute of Social and Preventive Medicine, University of Bern, Bern, Switzerland

23 12. Centre for Infectious Disease Epidemiology and Research, Faculty of Health Sciences,  
24 University of Cape Town, Cape Town, South Africa

25 13. Population Health Sciences, Bristol Medical School, University of Bristol, Bristol, UK

26 14. RTI Health Solutions, Barcelona, Spain

27 15. Northwestern University Feinberg School of Medicine, Chicago, IL, USA

28 16. Department of Biostatistics, Boston University School of Public Health, Boston, MA, USA

29 17. Clinical Epidemiology & Biostatistics Unit, Murdoch Children's Research Institute, Royal  
30 Children's Hospital, 50 Flemington Rd, Parkville, Melbourne, VIC, Australia

31 18. Department of Paediatrics, The University of Melbourne, Parkville, Australia

- 1  
2  
3 32 19. School of Population Health, Faculty of Medicine and Health, UNSW Sydney, Sydney,  
4 33 Australia  
5  
6 34 20. Division of Pharmacoepidemiology, Department of Medicine, Brigham & Women's Hospital,  
7 35 Harvard Medical School, Boston, MA, USA  
8  
9 36 21. Department of Population Health Sciences, Bristol Medical School, University of Bristol, UK  
10 37 22. NIHR Bristol Biomedical Research Centre, UK  
11  
12 38 23. Health Data Research UK South-West, Bristol, UK  
13  
14 39 24. Department of General Practice, RCSI University of Medicine and Health Sciences, Dublin,  
15 40 Ireland  
16  
17 41 25. Department of Mental Health, Johns Hopkins Bloomberg School of Public Health, Baltimore,  
18 42 MD, USA  
19  
20 43 26. University of Exeter Medical School, Exeter, UK  
21  
22  
23 44  
24  
25 45  
26  
27 46

28  
29 **Corresponding Author**

30 Harrison J Hansford

31  
32  
33 E: [h.hansford@unsw.edu.au](mailto:h.hansford@unsw.edu.au)

34  
35 School of Health Sciences, UNSW Sydney,  
36  
37 2052, Sydney, Australia  
38

39 52  
40  
41 **Words: 2809**  
42  
43  
44  
45  
46  
47  
48  
49  
50  
51  
52  
53  
54  
55  
56  
57  
58  
59  
60

1  
2  
3  
4 55 **Abstract**  
5  
6 56  
7  
8

9 57 **Background**

10  
11 58 Observational studies are increasingly used to inform health decision-making when  
12  
13  
14 59 randomised trials are not feasible, ethical, or timely. The target trial approach provides  
15  
16  
17 60 a framework to help minimise common biases in observational studies that aim to  
18  
19 61 estimate the causal effect of interventions. Incomplete reporting of studies using the  
20  
21  
22 62 target trial framework limits the ability for clinicians, researchers, patients, and other  
23  
24  
25 63 decision-makers to appraise, synthesise, and interpret findings to inform clinical and  
26  
27 64 public health practice and policy. This paper describes the methods that we will use to  
28  
29  
30 65 develop the transparent reporting of observational studies emulating a target trial  
31  
32 66 (TARGET) reporting guideline.  
33  
34  
35 67

36  
37 68 **Methods/design**

38  
39  
40 69 The TARGET reporting guideline will be developed in five stages following  
41  
42  
43 70 recommended guidance. The first stage will identify target trial reporting practices by  
44  
45  
46 71 systematically reviewing published studies that explicitly emulated a target trial. The  
47  
48  
49 72 second stage will identify and refine items to be considered for inclusion in the  
50  
51  
52 73 TARGET guideline by consulting content experts using online surveys. The third stage  
53  
54  
55 74 will prioritise and consolidate key items to be included in the TARGET guideline at a  
56  
57  
58 75 consensus meeting of TARGET investigators. The fourth stage will produce and pilot-  
59  
60 76 test the TARGET guideline and explanation and elaboration document with relevant

1  
2  
3  
4 77 stakeholders. The fifth stage will disseminate the TARGET guideline and resources  
5  
6 78 via journals, conferences, and courses.  
7  
8

9 79

## 10 11 80 **Ethics and Dissemination**

12  
13  
14 81 Ethical approval for the survey to be conducted has been attained (HC220536). The  
15  
16 82 TARGET guideline will be disseminated widely in partnership with stakeholders to  
17  
18  
19 83 maximise adoption and improve reporting of these studies.  
20  
21

22 84

23  
24 85 **Key words:** target trial emulation, causal inference, reporting guideline, observational  
25  
26  
27 86 studies  
28  
29

30 87

## 31 32 88 **Strengths and Limitations**

- 33  
34  
35 89 - The TARGET reporting guideline will be developed according to  
36  
37 90 recommendations for health research reporting guidelines  
38  
39  
40 91 - The TARGET working group has been established to include stakeholders  
41  
42 92 from a variety of backgrounds  
43  
44  
45 93 - A comprehensive piloting phase may increase the usability and uptake of the  
46  
47 94 reporting guideline  
48  
49

50  
51 95  
52  
53  
54  
55  
56  
57  
58  
59  
60

## 96 Introduction

97 Observational studies can provide evidence on the causal effects of interventions  
98 when it is not feasible, ethical, or timely to conduct a relevant randomised trial.

99 However, making causal inferences from observational data is challenging due to  
100 confounding and design-related biases such as selection bias and immortal time bias.<sup>1</sup>

101 <sup>2</sup> Design-related biases can be avoided using the target trial framework. <sup>3 4</sup> The  
102 framework involves the specification of the hypothetical randomised pragmatic trial —  
103 the target trial — that would ideally be conducted and how this trial might be emulated  
104 using observational data.<sup>3 4</sup> The two stages of the target trial framework are 1)  
105 specification of the target trial, and 2) emulation of the target trial.<sup>3 4</sup> Using  
106 observational data to mimic a randomised experiment was proposed in the mid 20<sup>th</sup>  
107 century,<sup>5-8</sup> and extended to time-varying treatments by Robins in 1986.<sup>9</sup>

108  
109 The value of using the target trial framework to design the analysis of observational  
110 studies has been recognised by international regulatory bodies in the field of medicine  
111 and health,<sup>10-14</sup> and the framework underpins the widely-used ROBINS-I tool for  
112 assessing risk of bias in non-randomised studies of interventions.<sup>15</sup> Studies that are  
113 explicit in using the target trial framework have been published with increasing  
114 frequency in leading general medical and specialty journals.<sup>16-21</sup>

115  
116 Application of the target trial framework requires the complete specification of the  
117 target trial protocol and its emulation (Figure 1).<sup>3</sup> Hernán & Robins<sup>3</sup> provide a template

1  
2  
3  
4 118 for specifying a target trial and its emulation; however, there is currently no detailed  
5  
6 119 guidance on reporting a study designed to emulate a target trial. Incomplete reporting  
7  
8  
9 120 of these studies limits the ability of clinicians, researchers, patients, and other  
10  
11 121 decision-makers to appraise and synthesise findings or interpret them to inform clinical  
12  
13  
14 122 and public health practice and policy. A reporting guideline that expands upon the  
15  
16 123 initial target trial emulation template<sup>3</sup> is needed to provide authors with comprehensive  
17  
18  
19 124 recommendations on how to completely and transparently report a study emulating a  
20  
21  
22 125 target trial.  
23  
24  
25 126  
26  
27 127  
28  
29  
30 128 **[INSERT FIGURE 1]**  
31  
32 129  
33  
34

35 130 To address this gap, we outline the processes and methods that used to develop a  
36  
37 131 reporting guideline for studies emulating a target trial – TARGET (Transparent  
38  
39  
40 132 reporting of observational studies emulating a target trial).  
41  
42  
43 133  
44

#### 45 134 **Objective**

46  
47  
48 135 The objective of the TARGET guideline is to provide guidance on the minimum set of  
49  
50 136 items that should be reported to provide a clear and transparent account of  
51  
52  
53 137 observational studies that investigate the comparative effectiveness and safety of  
54  
55  
56 138 health interventions explicitly using the target trial framework.  
57  
58  
59 139  
60

## 140 **Methods**

141 We will develop the TARGET Guideline in five stages following recommendations for  
142 the development of health research reporting guidelines (Figure 2).<sup>22</sup> The start date  
143 for the study was late 2022, with the planned end date early 2025.

144  
145 **[INSERT FIGURE 2]**

### 147 **TARGET working group**

148 The TARGET working group is made up of the steering committee and project team  
149 (Supplementary Material 1). The group was established to collate expertise on target  
150 trial emulation methodology, epidemiology, clinical trials, biostatistics, reporting  
151 guideline development, and knowledge of regulatory and journal editorial processes.  
152 The working group will oversee recruitment of participants for Stages 2 and 3 and  
153 contribute to writing and disseminating the guideline documents.

### 155 **Stage 1: Identify current reporting practices**

156 The systematic review aims to assess whether and how important items are reported  
157 by published studies explicitly emulating a target trial and whether reporting guidance  
158 (e.g., STROBE<sup>23</sup>) was used. The protocol for this systematic review was registered on  
159 the Open Science Framework on 13 March 2022 ([osf.io/uj56m](https://osf.io/uj56m)).

160  
161 *Databases, eligibility, and search terms*

1  
2  
3  
4 162 We will search Medline, EMBASE, PsycINFO and Science Citation Index for  
5  
6 163 observational studies that stated in their methods that they explicitly emulated a target  
7  
8 164 trial. We will exclude studies not written in English, not in the field of medicine and  
9  
10  
11 165 health, not conducted in humans, or not observational designs. Many observational  
12  
13  
14 166 studies may implicitly use the framework of a randomised trial. However, to be  
15  
16 167 included in this review studies must be explicit in their attempt to emulate a target trial  
17  
18  
19 168 (e.g., stated 'target trial emulation' in the article). To identify eligible studies, we  
20  
21  
22 169 developed a literature search in collaboration with an expert librarian at the University  
23  
24  
25 170 of Oxford. Our approach used sensitive search terms including emulat\*, target trial,  
26  
27 171 observational data, real-world data, comparative effectiveness, and causal inference,  
28  
29  
30 172 to try to capture all papers explicitly emulating a target trial. The complete search  
31  
32  
33 173 strategy is in Supplementary Material 2. We will conduct forward citation tracking of  
34  
35 174 selected seminal articles to maximise the chance of retrieving all relevant articles.<sup>3 9</sup>  
36  
37 175 <sup>24-26</sup> We will also include papers known to the authorship team. In duplicate,  
38  
39  
40 176 independent reviewers will conduct title, abstract, and full text screening. We will  
41  
42  
43 177 resolve disagreements between reviewers through discussion.  
44

178

### 179 *Data Extraction*

180 We will extract items regarded by the steering committee as potentially important for  
181 the reporting of a target trial emulation, including those outlined by Hernán and Robins,  
182 2016.<sup>3</sup> Two independent reviewers will extract information on study authors, year of  
183 publication, journal, sub-field of medicine, study design, sample size, intervention,



1  
2  
3  
4 184 comparison group, outcomes assessed, and whether the study was prospectively  
5  
6 185 registered. We will extract items relevant to the methods and results of the target trial  
7  
8  
9 186 emulation, including whether and how all components of the protocol of the proposed  
10  
11 187 target trial, and how they were emulated, were specified (i.e., eligibility criteria,  
12  
13  
14 188 treatment strategies, assignment procedures, follow-up period, outcome(s), causal  
15  
16 189 contrast(s), and data analysis plan). We will enter data into a standardised data  
17  
18  
19 190 extraction form which two authors will pilot with a selection of included studies. We will  
20  
21  
22 191 resolve disagreements in data extraction between reviewers through discussion, or  
23  
24 192 where necessary, consultation with a third reviewer.  
25  
26  
27 193

#### 28 29 194 *Data analysis*

30  
31  
32 195 We will use R<sup>27</sup> for all data analyses. Categorical variables will be summarised using  
33  
34  
35 196 frequencies and percentages. Continuous variables will be summarised using mean  
36  
37 197 and standard deviation, or median and interquartile range, as appropriate.  
38  
39

40 198

#### 41 42 43 199 *Outcomes of the systematic review*

44  
45 200 The systematic review will provide evidence on reporting in studies explicitly emulating  
46  
47  
48 201 a target trial. We acknowledge that excluding studies not written in English and  
49  
50  
51 202 unpublished studies may cause potentially relevant articles to be excluded. The  
52  
53 203 findings will inform the online surveys (Stage 2) and the consensus meeting (Stage 3).  
54  
55  
56 204 We will submit the findings of this review for publication and all data and code made  
57  
58 205 publicly available.  
59  
60

206

**207 Stage 2: Identify and refine items for the TARGET guideline**

208 We will conduct two online surveys to generate a list of candidate items that add detail  
209 to each of the protocol elements in Figure 1.

210

*211 Ethics*

212 Ethical approval has been obtained for the online surveys from the University of New  
213 South Wales Human Research Ethics Committee (HC220536).

214

*215 Selection of initial items*

216 The steering group will develop a list of key items, informed by the systematic review  
217 (Stage 1), and the target trial framework described by Hernán & Robins,<sup>3</sup> thought  
218 important for the conduct and reporting target trial emulations (Figure 1). Other  
219 potential sources of items include: published guidance for observational studies and  
220 randomised controlled trials, the ROBINS-I tool,<sup>15</sup> and studies that describe items that  
221 may be important for the conduct or reporting of target trial emulations.

222

*223 Participants*

224 Members of the TARGET working group (Supplementary Material 1) will be invited to  
225 participate in the surveys.

226

*227 Procedure*

1  
2  
3  
4 228 We will host two online surveys using REDCap.<sup>28 29</sup> We will send each online survey  
5  
6 229 via email to the participants. We will ask participants to rate the importance of each  
7  
8 230 potential reporting item on a 9-point Likert scale (1, “not important”, to 9, “critically  
9  
10 231 important”). Participants will have the opportunity to provide suggestions or  
11  
12 232 modifications to the wording of items as well as suggest additional items or make other  
13  
14 233 comments.  
15  
16  
17  
18

19 234  
20  
21 235 In the second survey, we will send participants a summary of the results for each  
22  
23 236 potential reporting item (mean scores and standard deviations, median scores and  
24  
25 237 interquartile ranges, and histograms), their own score for each item, and any  
26  
27 238 comments from participants on each item from the first survey. We will also present  
28  
29 239 any new items and suggested modifications to items. We will then invite participants  
30  
31 240 to re-score the importance of each item, and score any additional items, considering  
32  
33 241 the aggregated ratings. Participants will have the opportunity to provide additional  
34  
35 242 feedback on each item in the form of open ended responses.  
36  
37  
38  
39  
40  
41  
42  
43  
44

#### 45 244 *Analysis*

46  
47  
48 245 Continuous variables will be summarised using mean and standard deviation, or  
49  
50 246 median and interquartile range, as appropriate. We will analyse the free-text  
51  
52 247 responses from the first and second surveys using an inductive approach,<sup>30</sup> in which  
53  
54 248 we will use reflexive thematic<sup>30</sup> analysis to identify, organise and generate codes, and  
55  
56 249 then identify themes found within the dataset. Briefly, inductive coding is a process  
57  
58  
59  
60

1  
2  
3  
4 250 pooling common ideas without trying to fit ideas/codes into a pre-existing framework.  
5

6 251 These data will contribute to the creation of new items and modification of existing  
7  
8  
9 252 items to be included in the subsequent survey.  
10

11 253  
12

13  
14 254 *Outcome of the online surveys*  
15

16 255 We will generate a preliminary list of items with corresponding ratings of importance  
17  
18  
19 256 to be considered in the TARGET guideline at the consensus meeting (Stage 3). We  
20  
21  
22 257 will also generate qualitative insights to guide item refinement and prioritisation in  
23  
24  
25 258 preparation for the consensus meeting.  
26

27 259  
28

29  
30 260 **Stage 3 – Consolidate and prioritise key items to be included in the TARGET guideline**  
31

32 261 A consensus meeting will finalise reporting items for the TARGET guideline.<sup>22</sup> The  
33  
34  
35 262 consensus meeting will follow suggested methods for developing reporting  
36  
37  
38 263 guidelines,<sup>22</sup> including guidance for consensus-based methods currently being  
39  
40 264 developed which we will use if they become available.<sup>31</sup>  
41  
42

43 265  
44

45 266 *Process*  
46

47  
48 267 We will invite stakeholders identified by the working group to participate in a two-day  
49  
50  
51 268 consensus meeting. The TARGET working group will ensure that the expertise of  
52  
53  
54 269 consensus meeting participants includes target trial emulation methodology,  
55  
56 270 epidemiology, clinical trials, biostatistics, reporting guideline development, and  
57  
58 271 regulatory and journal editorial processes. Prior to the consensus meeting, the core  
59  
60

1  
2  
3  
4 272 team will provide attendees with evidence from the systematic review (Stage 1) and  
5  
6 273 findings from the online surveys (Stage 2) including a draft of the items proposed for  
7  
8  
9 274 inclusion in the guideline. We will present the findings from Stage 1 and 2 at the  
10  
11 275 consensus meeting. A member of the TARGET working group will facilitate a  
12  
13  
14 276 structured discussion on the rationale for including items from the online surveys. If  
15  
16  
17 277 there are disagreements, they will first be debated and, if disagreements remain, we  
18  
19 278 will hold an anonymised vote to establish the importance of including the item in the  
20  
21  
22 279 guideline. For the anonymised vote, a simple majority will be sufficient to guide the  
23  
24  
25 280 inclusion/exclusion of an item. The meeting will conclude with discussion about the  
26  
27 281 content and production of relevant documents (TARGET guideline, draft explanation  
28  
29 282 and elaboration document) as well as strategies for dissemination and implementation.  
30  
31  
32 283 Following the conclusion of the consensus meeting, we will circulate a report on the  
33  
34  
35 284 outcome to the meeting participants for review and approval.  
36  
37  
38  
39

40 286 **Stage 4 – Development and piloting of the draft TARGET guideline and explanation**  
41  
42 287 **and elaboration document**  
43  
44

45 288 Stage 4 involves drafting the TARGET guideline and accompanying explanation and  
46  
47  
48 289 elaboration document to ensure that the wording and content of the documents are  
49  
50  
51 290 clear, precise, and suitable for all identified stakeholders. The purpose of the  
52  
53 291 explanation and elaboration document is to explain each item by providing background  
54  
55  
56 292 information, a rationale, and clear reporting examples from published target trial  
57  
58 293 emulations. We will design the explanation and elaboration document to facilitate  
59  
60

1  
2  
3  
4 294 adherence to the TARGET guideline by clarifying the importance of each item,  
5  
6 295 highlighting relevant reporting issues and providing examples to assist authors using  
7  
8  
9 296 the guideline. The consensus meeting participants may be asked to review and  
10  
11 297 comment on the draft TARGET guideline and explanation and elaboration document.  
12  
13

14 298

15  
16 299 We will evaluate the TARGET guideline by piloting the proposed guideline and the  
17  
18  
19 300 explanation and elaboration document with 20-30 expert methodologists and potential  
20  
21  
22 301 users of TARGET, identified from TARGET working group networks. We will ask  
23  
24  
25 302 participants to provide general feedback on accessibility and usability, and to identify  
26  
27 303 possible reporting items that might have been overlooked. We will also ask for specific  
28  
29  
30 304 feedback about the utility and clarity of each TARGET item. We will collect data  
31  
32 305 through online surveys, hosted by REDCap.<sup>28 29</sup> We will incorporate feedback from the  
33  
34  
35 306 piloting exercise into the final guideline and explanation and elaboration document, as  
36  
37 307 required. If suggested revisions are extensive, we will conduct a further round of  
38  
39  
40 308 piloting.  
41

42  
43 309

#### 44 45 310 *Patient and public involvement*

46  
47  
48 311 Potential users of this research include health researchers conducting observational  
49  
50 312 analyses, regulatory bodies, public health and other health decision-makers. We aim  
51  
52  
53 313 to include relevant decision-makers in the piloting phase of the guideline development  
54  
55  
56 314 process to maximise the usefulness and uptake of the TARGET guideline. Participants  
57  
58  
59  
60

1  
2  
3  
4 315 in any stage of the guideline development will be informed of the results and final  
5  
6 316 guidance.  
7

8  
9 317

## 10 11 318 **Stage 5 – Guideline implementation**

12  
13  
14 319 The goal of the final stage of guideline development is to maximise reach and use of  
15  
16 320 the TARGET guideline. The TARGET working group will guide the dissemination  
17  
18 321 strategy with advice from consensus meeting participants. We aim to publish the  
19  
20 322 TARGET guideline and the explanation and elaboration document and disseminate  
21  
22 323 the findings through traditional and social media. We will engage journal editors and  
23  
24 324 funding agencies to encourage TARGET guideline endorsement alongside other  
25  
26 325 published reporting guidance. We will publicly host the TARGET guideline and  
27  
28 326 explanation and elaboration paper, and any other relevant material on a TARGET  
29  
30 327 website. We will index the guideline on the Enhancing the QUALity and Transparency  
31  
32 328 Of health Research (EQUATOR) Network website.<sup>32 33</sup> We will create online resources  
33  
34 329 including infographics, blog posts and podcasts, which will be available on the  
35  
36 330 TARGET website. We will share the TARGET guideline with authors in the field, and  
37  
38 331 at relevant scientific conferences and methodological courses.  
39  
40  
41  
42  
43  
44  
45  
46  
47  
48  
49  
50  
51  
52  
53  
54  
55  
56  
57  
58  
59  
60

1  
2  
3  
4 332 **Declarations**

5  
6 333

7  
8  
9 334 **Ethics approval and consent to participate**

10  
11 335 Not Applicable

12  
13  
14 336

15  
16 337 **Consent for publication**

17  
18  
19 338 All authors consent to publication of this manuscript

20  
21  
22 339

23  
24 340 **Availability of data and materials**

25  
26  
27 341 Not applicable

28  
29  
30 342

31  
32 343 **Funding**

33  
34  
35 344 There was no specific funding for this study. HJH was supported by an Australian

36  
37 345 National Health and Medical Research Council (NHMRC) Postgraduate Scholarship,

38  
39  
40 346 a PhD Top-Up Scholarship from Neuroscience Research Australia, and was a

41  
42 347 Neuroscience Research Australia PhD Pearl sponsored by Paul Salteri AO. AGC

43  
44  
45 348 was supported by an Australian NHMRC Investigator Grant (ID 2010088). MM-B was

46  
47  
48 349 supported by an Australian NHMRC Investigator Grant (ID 2009572). JM was

49  
50  
51 350 supported by an Australian NHMRC Investigator Grant (ID 2010128). BAD was

52  
53 351 supported by a grant from the National Institutes of Health (R00 CA248335). ME was

54  
55  
56 352 supported by grants from the National Institutes of Health (R01 AI152772-01, 5U01-

57  
58 353 AI069924-05) and the Swiss National Science Foundation (32FP30-174281). NI was

59  
60



1  
2  
3  
4 354 supported by grants from the National Institute for Health and Care Research  
5  
6 355 (HDRUK2022.0313) and the UK Office for National Statistics (2002563). MAH was  
7  
8  
9 356 supported by NIH grant R37 AI102634.  
10

11 357

### 14 358 **Competing interests**

16 359 All authors declare no competing interests.  
17  
18

19 360

### 22 361 **Author Contributions**

24 362 HJH, AGC, MDJ, HL, JHM, conceived the idea for the project protocol. All authors  
25  
26  
27 363 contributed to the design and methodology of the project protocol. HJH and AGC wrote  
28  
29  
30 364 the first draft of the manuscript. MAH, SAS, IJD, BAD, XG-A, ME, RMG, NI, SL, MM-  
31  
32 365 B, SAP, SS, JACS, MKS, EAS provided feedback, revised the manuscript and have  
33  
34  
35 366 read and approved the final version.  
36

37 367

### 40 368 **Acknowledgements**

42 369 We acknowledge Nia Roberts, outreach librarian and information specialist at the  
43  
44  
45 370 University of Oxford for assistance designing the literature search.  
46  
47  
48  
49  
50  
51  
52  
53  
54  
55  
56  
57  
58  
59  
60

1  
2  
3  
4 372 **Abbreviations**

5 373

6  
7  
8 374 **EQUATOR:** Enhancing the QUALity and Transparency Of health Research

9  
10 375 **REDCap:** Research Electronic Data Capture

11  
12  
13 376 **STROBE:** Strengthening the Reporting of Observational Studies in Epidemiology

14  
15  
16 377 **TARGET:** TrAnSPARENT ReportinG of studies Emulating a Target trial

17  
18 378

19  
20  
21 379 **Figure Captions**

22  
23 380

24  
25  
26 381 Figure 1: Elements relevant to both the specification and emulation of the target trial  
27  
28 described by Hernán & Robins<sup>3</sup>

29 382  
30  
31 383 Figure 2: Workflow for the development of the TARGET guideline

32  
33 384

34  
35 385

36  
37 386  
38  
39  
40  
41  
42  
43  
44  
45  
46  
47  
48  
49  
50  
51  
52  
53  
54  
55  
56  
57  
58  
59  
60

387 **References**

- 388 1. Hernán MA, Sauer BC, Hernández-Díaz S, et al. Specifying a target trial prevents immortal  
389 time bias and other self-inflicted injuries in observational analyses. *J Clin Epidemiol*  
390 2016;79:70-75. doi: 10.1016/j.jclinepi.2016.04.014 [published Online First:  
391 2016/05/31]
- 392 2. Dickerman BA, García-Albéniz X, Logan RW, et al. Avoidable flaws in observational  
393 analyses: an application to statins and cancer. *Nature Medicine* 2019;25(10):1601-  
394 06. doi: 10.1038/s41591-019-0597-x
- 395 3. Hernán MA, Robins JM. Using big data to emulate a target trial when a randomized trial is  
396 not available. *American journal of epidemiology* 2016;183(8):758-64.
- 397 4. Hernán MA. Methods of public health research—strengthening causal inference from  
398 observational data. *New England Journal of Medicine* 2021;385(15):1345-48.
- 399 5. Cochran WG. Observational studies. *Statistical papers in honor of George W Snedecor*  
400 1972:77-90.
- 401 6. Dorn HF. Philosophy of inferences from retrospective studies. *American Journal of Public*  
402 *Health and the Nations Health* 1953;43(6\_Pt\_1):677-83.
- 403 7. Rubin DB. Estimating causal effects of treatments in randomized and nonrandomized  
404 studies. *Journal of Educational Psychology* 1974;66(5):688.
- 405 8. Wold H. Causality and econometrics. *Econometrica: Journal of the Econometric Society*  
406 1954:162-77.
- 407 9. Robins J. A new approach to causal inference in mortality studies with a sustained  
408 exposure period—application to control of the healthy worker survivor effect.  
409 *Mathematical Modelling* 1986;7(9-12):1393-512.
- 410 10. Concato J, Stein P, Dal Pan GJ, et al. Randomized, observational, interventional, and  
411 real-world—What's in a name? *Pharmacoepidemiology and Drug Safety*  
412 2020;29(11):1514-17.
- 413 11. Agency EM. European medicines agencies network strategy to 2025. The Netherlands:  
414 Health of Medicines Agencies, 2020.
- 415 12. Excellence NifHaC. The NICE strategy 2021 to 2026, 2021.
- 416 13. Health Canada. Optimizing the Use of Real World Evidence to Inform Regulatory  
417 Decision-Making: Government of Canada, 2019.
- 418 14. Therapeutic Goods Administration. Real world evidence and patient reported outcomes  
419 in the regulatory context. [https://www.tga.gov.au/review-real-world-evidence-and-  
420 patient-reported-outcomes](https://www.tga.gov.au/review-real-world-evidence-and-patient-reported-outcomes): Australian Government, Department of Health, 2021.
- 421 15. Sterne JA, Hernán MA, Reeves BC, et al. ROBINS-I: a tool for assessing risk of bias in non-  
422 randomised studies of interventions. *BMJ* 2016;355:i4919. doi: 10.1136/bmj.i4919
- 423 16. Garcia-Albeniz XH, J.: Bretthauer, M.: Hernan, M. A. Effectiveness of screening  
424 colonoscopy to prevent colorectal cancer among medicare beneficiaries aged 70 to  
425 79 years: A prospective observational study. *Annals of Internal Medicine* 2017 doi:  
426 <http://dx.doi.org/10.7326/M16-0758>
- 427 17. Mahévas M, Tran V-T, Roumier M, et al. Clinical efficacy of hydroxychloroquine in  
428 patients with covid-19 pneumonia who require oxygen: observational comparative  
429 study using routine care data. *BMJ* 2020;369:m1844. doi: 10.1136/bmj.m1844
- 430 18. Kaura A, Sterne JAC, Trickey A, et al. Invasive versus non-invasive management of older  
431 patients with non-ST elevation myocardial infarction (SENIOR-NSTEMI): a cohort

- 1  
2  
3 432 study based on routine clinical data. *The Lancet* 2020;396(10251):623-34. doi:  
4 433 10.1016/S0140-6736(20)30930-2  
5  
6 434 19. Emilsson L, García-Albéniz X, Logan RW, et al. Examining Bias in Studies of Statin  
7 435 Treatment and Survival in Patients With Cancer. *JAMA Oncol* 2018;4(1):63-70. doi:  
8 436 10.1001/jamaoncol.2017.2752  
9  
10 437 20. Chan You S, Krumholz HM, Suchard MA, et al. Comprehensive Comparative Effectiveness  
11 438 and Safety of First-Line  $\beta$ -Blocker Monotherapy in Hypertensive Patients: A Large-  
12 439 Scale Multicenter Observational Study. *Hypertension* 2021;77(5):1528-38. doi:  
13 440 10.1161/hypertensionaha.120.16402 [published Online First: 20210329]  
14 441 21. Caniglia EC, Robins JM, Cain LE, et al. Emulating a trial of joint dynamic strategies: An  
15 442 application to monitoring and treatment of HIV-positive individuals. *Stat Med*  
16 443 2019;38(13):2428-46. doi: 10.1002/sim.8120 [published Online First: 20190318]  
17 444 22. Moher D, Schulz KF, Simera I, et al. Guidance for developers of health research reporting  
18 445 guidelines. *PLoS medicine* 2010;7(2):e1000217.  
19 446 23. Von Elm E, Altman DG, Egger M, et al. The Strengthening the Reporting of Observational  
20 447 Studies in Epidemiology (STROBE) statement: guidelines for reporting observational  
21 448 studies. *Bulletin of the World Health Organization* 2007;85:867-72.  
22 449 24. Hernán MA, Sauer BC, Hernández-Díaz S, et al. Specifying a target trial prevents  
23 450 immortal time bias and other self-inflicted injuries in observational analyses. *Journal*  
24 451 *of Clinical Epidemiology* 2016;79:70-75. doi: 10.1016/j.jclinepi.2016.04.014  
25 452 [published Online First: 2016/05/31]  
26 453 25. Hernán MA. How to estimate the effect of treatment duration on survival outcomes  
27 454 using observational data. *Bmj* 2018;360:k182. doi: 10.1136/bmj.k182 [published  
28 455 Online First: 2018/02/09]  
29 456 26. Robins JM, Hernan, M. J. Estimation of the causal effects of time-varying exposures. In:  
30 457 Fitzmaurice G, Davidian M, Verbeke G, et al., eds. *Longitudinal Data Analysis: CRC*  
31 458 *press* 2008.  
32 459 27. R Core Team. R: A language and environment for statistical computing. 2013  
33 460 28. Harris PA, Taylor R, Minor BL, et al. The REDCap consortium: Building an international  
34 461 community of software platform partners. *Journal of Biomedical Informatics*  
35 462 2019;95:103208. doi: <https://doi.org/10.1016/j.jbi.2019.103208>  
36 463 29. Harris PA, Taylor R, Thielke R, et al. Research electronic data capture (REDCap)—A  
37 464 metadata-driven methodology and workflow process for providing translational  
38 465 research informatics support. *Journal of Biomedical Informatics* 2009;42(2):377-81.  
39 466 doi: <https://doi.org/10.1016/j.jbi.2008.08.010>  
40 467 30. Braun V, Clarke V. Using thematic analysis in psychology. *Qualitative Research in*  
41 468 *Psychology* 2006;3(2):77-101. doi: 10.1191/1478088706qp063oa  
42 469 31. Gattrell WT, Hungin AP, Price A, et al. ACCORD guideline for reporting consensus-based  
43 470 methods in biomedical research and clinical practice: a study protocol. *Research*  
44 471 *Integrity and Peer Review* 2022;7(1):3. doi: 10.1186/s41073-022-00122-0  
45 472 32. The EQUATOR Network. EQUATOR Network - Enhancing the QUALity and Transparency  
46 473 Of health Research 2022 [Available from: <https://www.equator-network.org/2022>.  
47 474 33. Simera I, Moher D, Hoey J, et al. A catalogue of reporting guidelines for health research.  
48 475 *European journal of clinical investigation* 2010;40(1):35-53.  
49 476  
50  
51  
52  
53  
54  
55  
56  
57  
58  
59 477  
60

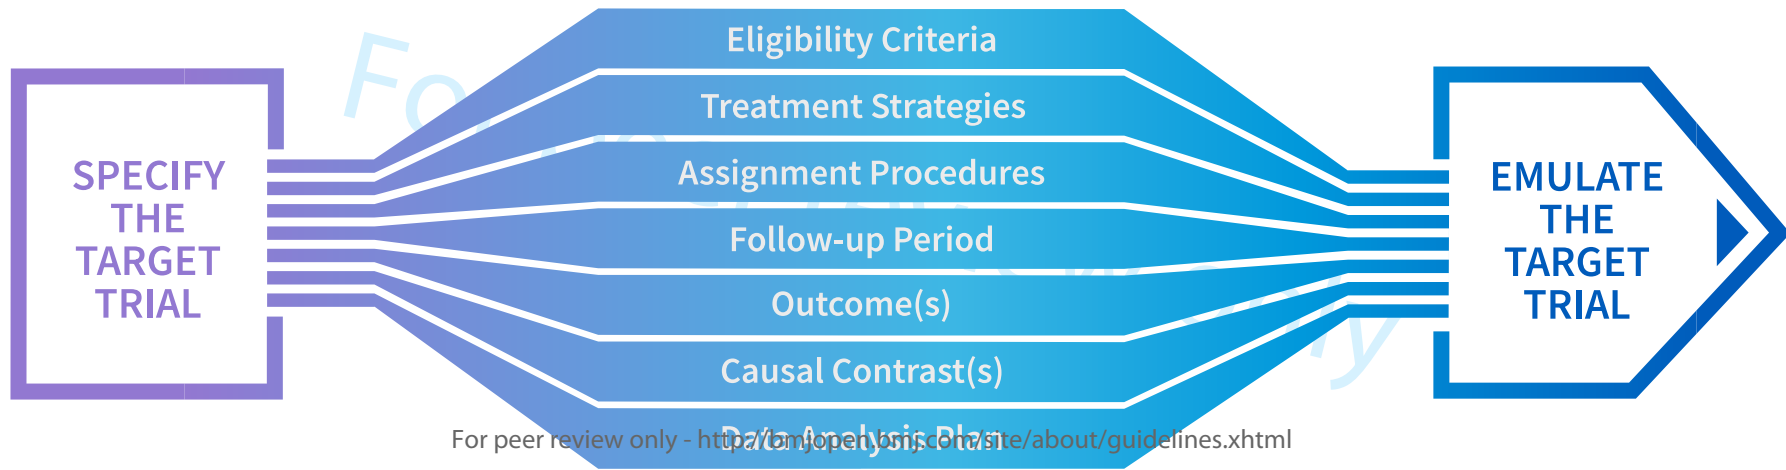

1  
2  
3  
4  
5  
6  
7  
8  
9  
10  
11  
12  
13  
14  
15  
16  
17  
18  
19  
20  
21  
22  
23  
24  
25  
26  
27  
28  
29  
30  
31  
32  
33  
34  
35  
36  
37  
38  
39  
40  
41  
42  
43  
44  
45  
46  
47  
48  
49  
50  
51  
52  
53  
54  
55  
56  
57  
58  
59  
60

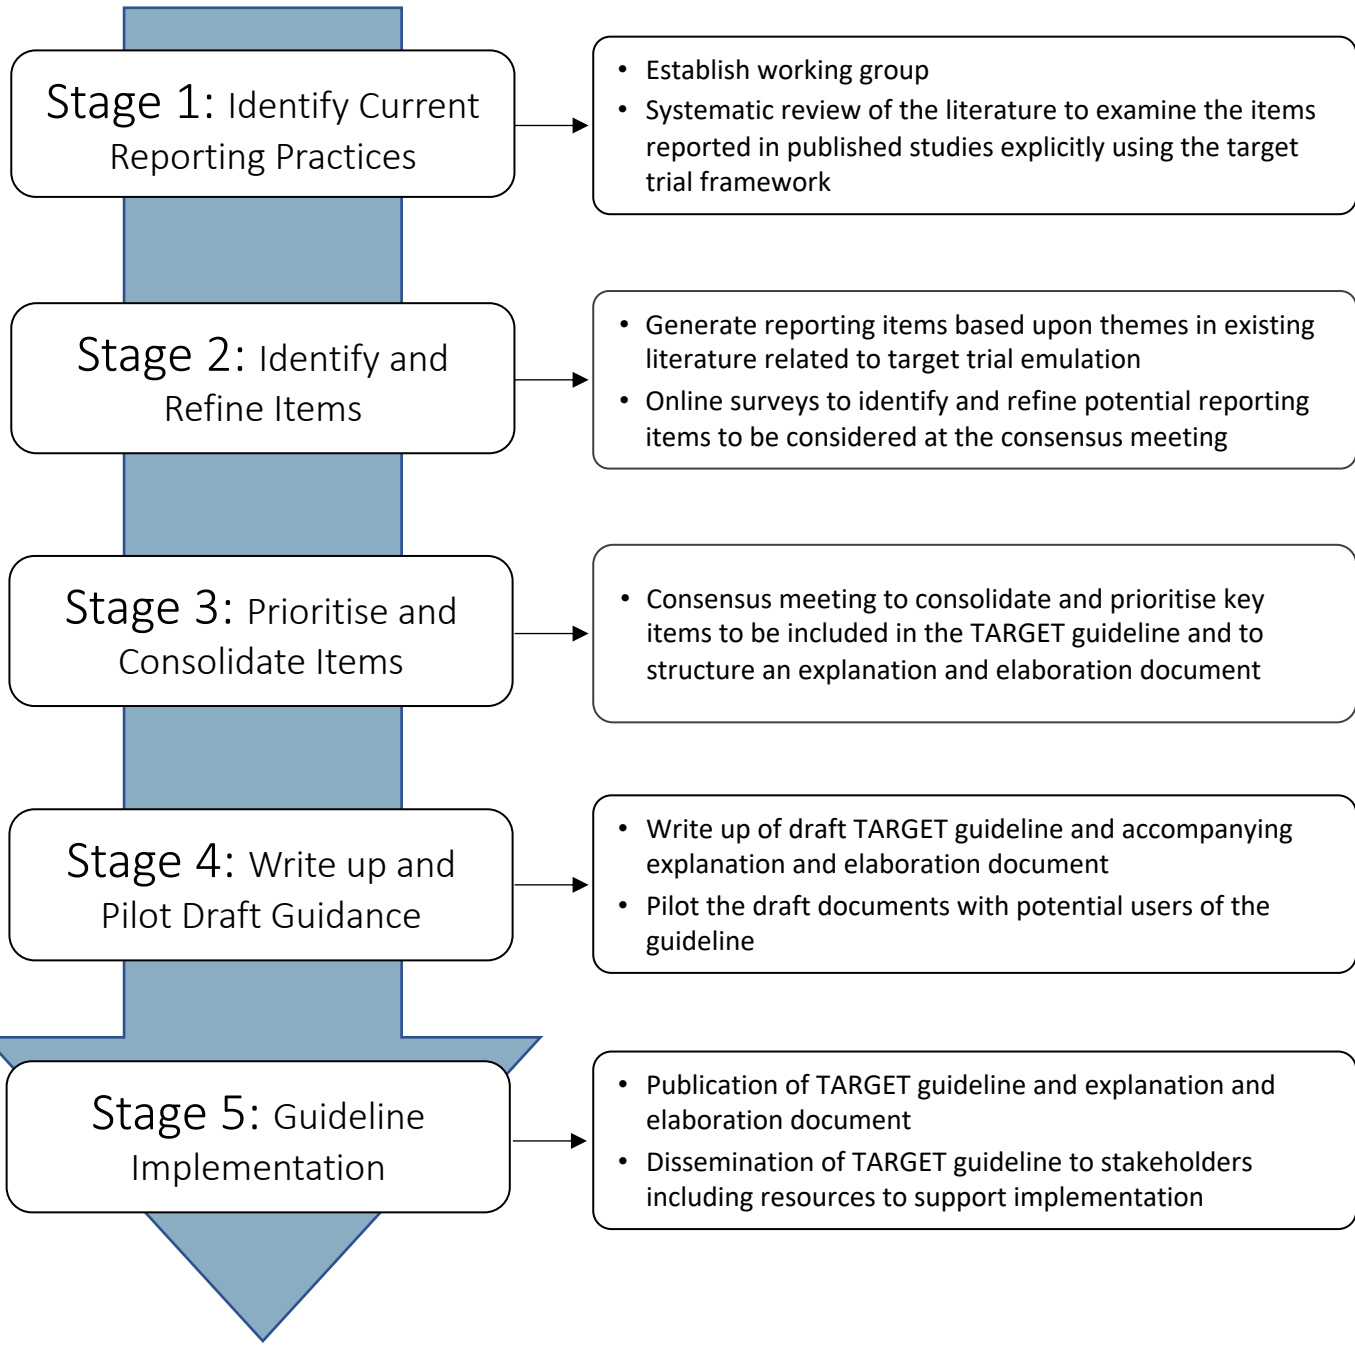

1  
2  
3 1 **Supplementary Material**  
4  
5 2

6  
7 3 **Supplementary Material 1: TARGET working group members (alphabetical)**  
8

9 4  
10 5 *Steering committee*

11 6 Dr Aidan G. Cashin

12 7 Mr Harrison J. Hansford

13 8 Prof Miguel A. Hernán

14 9 Dr Hopin Lee

15 10 Dr Matthew D. Jones

16 11 Prof James H. McAuley

17 12 A/Prof Sonja A. Swanson  
18  
19  
20

21 13  
22 14 *Project team*

23 15 A/Prof Issa J. Dahabreh

24 16 A/Prof Barbra A. Dickerman

25 17 Prof Matthias Egger

26 18 Dr Xabier Garcia-Albeniz

27 19 Prof Robert M. Golub

28 20 A/Prof Nazrul Islam

29 21 A/Prof Sara Lodi

30 22 A/Prof Margarita Moreno-Betancur

31 23 Prof Sallie A. Pearson

32 24 Prof Sebastian Schneeweiss

33 25 Prof Jonathan A. C. Sterne

34 26 Dr Melissa K. Sharp

35 27 Prof Elizabeth A. Stuart  
36  
37  
38  
39  
40  
41  
42  
43  
44  
45  
46  
47  
48  
49  
50  
51  
52  
53  
54  
55  
56  
57  
58  
59  
60

1  
2  
3 **30 Supplementary Material 2: Complete search strategies for all databases**  
4

5 31

6 32 **Medline**

- 7  
8 33 1 (emulat\* adj5 trial?).mp.  
9 34 2 (target adj (trial? or experiment?)).mp.  
10 35 3. (observational adj (stud\* or research or data)).mp.  
11 36 4. ((real world or rwd) adj2 (stud\* or research or data)).mp.  
12 37 5. (routine\* adj2 data).mp.  
13 38 6. (comparative effectiveness adj2 (stud\* or research or data)).mp.  
14 39 7. (emulat\* or propensity score? or (causal adj2 (inference? or analys?s or  
15 40 effect\*))).mp.  
16 41 8. 3 or 4 or 5 or 6 or 7  
17 42 9. 2 and 8  
18 43 10. (target adj (trial? or experiment?)).ti.  
19 44 11. 1 or 9 or 10  
20 45 Filtered for time (2012-2022) manually after search  
21 46

22 47 **Embase**

- 23 48 1. (emulat\* adj5 trial?).mp.  
24 49 2. (target adj (trial? or experiment?)).mp.  
25 50 3. (observational adj (stud\* or research or data)).mp.  
26 51 4. ((real world or rwd) adj2 (stud\* or research or data)).mp.  
27 52 5. (routine\* adj2 data).mp.  
28 53 6. (comparative effectiveness adj2 (stud\* or research or data)).mp.  
29 54 7. (emulat\* or propensity score? or (causal adj2 (inference? or analys?s or  
30 55 effect\*))).mp.  
31 56 8. 3 or 4 or 5 or 6 or 7  
32 57 9. 2 and 8  
33 58 10. (target adj (trial? or experiment?)).ti.  
34 59 11. 1 or 9 or 10  
35 60

36 61 **psycINFO**

- 37 62 noft(target trial emulat\*) OR ((noft(real world data) OR (noft(emulat\* trial)) OR  
38 63 noft(observational) OR noft(routine\* data)) AND noft(comparative effective\*)  
39 64 AND noft(causal infer\*))  
40 65

41 66 **Web of Science**

- 42 67 (TI=(emulat\* trial)) OR (TI=(real world data) OR TI=(routine\* data) OR  
43 68 TI=(comparative effectiveness study comparative effectiveness research or  
44 69 comparative effectiveness data) OR (TI=(emulat\* or propensity score?) AND  
45 70 TI=(causal inference or causal analysis or causal effect\*)) AND ALL=(target  
46 71 trial or emulat\* or target trial emulation)



# BMJ Open

## Development of the Transparent Reporting of Observational Studies Emulating a Target Trial (TARGET) Guideline

|                               |                                                                                                                                                                                                                                                                                                                                                                                                                                                                                                                                                                                                                                                                                                                                                                                                                                                                                                                                                                                                                                                                                                                                                                                                                                                                                                                                                                                                                                                                                                                                                                                                                                                                                                                                                                                                                                                                                                                                                                                                                                                                                                                                                                                                                                                                                                                                                                                                                                                        |
|-------------------------------|--------------------------------------------------------------------------------------------------------------------------------------------------------------------------------------------------------------------------------------------------------------------------------------------------------------------------------------------------------------------------------------------------------------------------------------------------------------------------------------------------------------------------------------------------------------------------------------------------------------------------------------------------------------------------------------------------------------------------------------------------------------------------------------------------------------------------------------------------------------------------------------------------------------------------------------------------------------------------------------------------------------------------------------------------------------------------------------------------------------------------------------------------------------------------------------------------------------------------------------------------------------------------------------------------------------------------------------------------------------------------------------------------------------------------------------------------------------------------------------------------------------------------------------------------------------------------------------------------------------------------------------------------------------------------------------------------------------------------------------------------------------------------------------------------------------------------------------------------------------------------------------------------------------------------------------------------------------------------------------------------------------------------------------------------------------------------------------------------------------------------------------------------------------------------------------------------------------------------------------------------------------------------------------------------------------------------------------------------------------------------------------------------------------------------------------------------------|
| Journal:                      | <i>BMJ Open</i>                                                                                                                                                                                                                                                                                                                                                                                                                                                                                                                                                                                                                                                                                                                                                                                                                                                                                                                                                                                                                                                                                                                                                                                                                                                                                                                                                                                                                                                                                                                                                                                                                                                                                                                                                                                                                                                                                                                                                                                                                                                                                                                                                                                                                                                                                                                                                                                                                                        |
| Manuscript ID                 | bmjopen-2023-074626.R2                                                                                                                                                                                                                                                                                                                                                                                                                                                                                                                                                                                                                                                                                                                                                                                                                                                                                                                                                                                                                                                                                                                                                                                                                                                                                                                                                                                                                                                                                                                                                                                                                                                                                                                                                                                                                                                                                                                                                                                                                                                                                                                                                                                                                                                                                                                                                                                                                                 |
| Article Type:                 | Protocol                                                                                                                                                                                                                                                                                                                                                                                                                                                                                                                                                                                                                                                                                                                                                                                                                                                                                                                                                                                                                                                                                                                                                                                                                                                                                                                                                                                                                                                                                                                                                                                                                                                                                                                                                                                                                                                                                                                                                                                                                                                                                                                                                                                                                                                                                                                                                                                                                                               |
| Date Submitted by the Author: | 24-Aug-2023                                                                                                                                                                                                                                                                                                                                                                                                                                                                                                                                                                                                                                                                                                                                                                                                                                                                                                                                                                                                                                                                                                                                                                                                                                                                                                                                                                                                                                                                                                                                                                                                                                                                                                                                                                                                                                                                                                                                                                                                                                                                                                                                                                                                                                                                                                                                                                                                                                            |
| Complete List of Authors:     | <p>Hansford, Harrison; University of New South Wales; Neuroscience Research Australia</p> <p>Cashin, Aidan; Neuroscience Research Australia, Centre for Pain IMPACT; University of New South Wales, School of Health Sciences, Faculty of Medicine and Health</p> <p>Jones, Matthew; University of New South Wales; Neuroscience Research Australia, Centre for Pain IMPACT</p> <p>Swanson, Sonja; University of Pittsburgh, Department of Epidemiology; Harvard T.H. Chan School of Public Health, CAUSALab, Department of Epidemiology</p> <p>Islam, Nazrul; University of Oxford, Big data institute; University of Southampton, Faculty of Medicine</p> <p>Dahabreh, Isa; , Beth Israel Deaconess Medical Center and Harvard Medical School, Richard A. and Susan F. Smith Center for Outcomes Research; Harvard T.H. Chan School of Public Health, CAUSALab, Department of Epidemiology, Department of Biostatistics</p> <p>Dickerman, Barbra; Harvard TH Chan School of Public Health, CAUSALab; Harvard TH Chan School of Public Health, Department of Epidemiology</p> <p>Egger, Matthias; University of Bern, Institute of Social &amp; Preventive Medicine; University of Cape Town Faculty of Health Sciences, Centre for Infectious Disease Epidemiology and Research</p> <p>Garcia-De-Albeniz, Xavier ; Harvard University T H Chan School of Public Health, CAUSALab; RTI Health Solutions Barcelona</p> <p>Golub, Robert ; Northwestern University Feinberg School of Medicine</p> <p>Lodi, Sara; Harvard TH Chan School of Public Health, CAUSALab; Boston University School of Public Health, Department of Biostatistics</p> <p>Moreno-Betancur , Margarita ; Murdoch Children's Research Institute, Melbourne, Clinical Epidemiology &amp; Biostatistics Unit; The University of Melbourne, Department of Paediatrics</p> <p>Pearson, Sallie-Anne; University of New South Wales, School of Population Health</p> <p>Schneeweiss , Sebastian ; Harvard Medical School, Boston, USA, Division of Pharmacoepidemiology, Department of Medicine, Brigham &amp; Women's Hospital,</p> <p>Sterne, Jonathan; University of Bristol, Department of Population Health Sciences; NIHR Bristol Biomedical Research Centre</p> <p>Sharp, Melissa; RCSI University of Medicine and Health Sciences, Department of General Practice</p> <p>Stuart, Elizabeth A; Johns Hopkins Bloomberg School of Public Health, Department of Mental Health</p> |

|                                    |                                                                                                                                                                                                                                                                                                                                                                                 |
|------------------------------------|---------------------------------------------------------------------------------------------------------------------------------------------------------------------------------------------------------------------------------------------------------------------------------------------------------------------------------------------------------------------------------|
|                                    | Hernan, M; Harvard School of Public Health, CAUSALab; Harvard T.H Chan School of Public Health, Department of Epidemiology, Department of Biostatistics<br>Lee, Hopin; University of Exeter Medical School<br>McAuley, James; University of New South Wales, School of Health Sciences, Faculty of Medicine and Health; Neuroscience Research Australia, Centre for Pain IMPACT |
| <b>Primary Subject Heading</b> :   | Epidemiology                                                                                                                                                                                                                                                                                                                                                                    |
| <b>Secondary Subject Heading</b> : | Research methods                                                                                                                                                                                                                                                                                                                                                                |
| <b>Keywords</b> :                  | EPIDEMIOLOGY, Retrospective Studies, STATISTICS & RESEARCH METHODS                                                                                                                                                                                                                                                                                                              |
|                                    |                                                                                                                                                                                                                                                                                                                                                                                 |

SCHOLARONE™  
Manuscripts

# 1 Development of the Transparent Reporting of Observational Studies Emulating a Target 2 Trial (TARGET) Guideline

3  
4 Harrison J. Hansford<sup>1,2</sup>, Aidan G. Cashin<sup>1,2</sup>, Matthew D. Jones<sup>1,2</sup>, Sonja A. Swanson<sup>3,8,9</sup>,  
5 Nazrul Islam<sup>5,6</sup>, Issa J. Dahabreh<sup>7,8,9,10</sup>, Barbra A. Dickerman<sup>8,9</sup>, Matthias Egger<sup>11,12,13</sup>,  
6 Xabier Garcia-Albeniz<sup>8,14</sup>, Robert M. Golub<sup>15</sup>, Sara Lodi<sup>8,16</sup>, Margarita Moreno-  
7 Betancur<sup>17,18</sup>, Sallie-Anne Pearson<sup>19</sup>, Sebastian Schneeweiss<sup>20</sup>, Jonathan A. C.  
8 Sterne<sup>21,22,23</sup>, Melissa K. Sharp<sup>24</sup>, Elizabeth A. Stuart<sup>25</sup>, Miguel A. Hernán<sup>8,9,10</sup>, Hopin  
9 Lee<sup>26</sup>, James H. McAuley<sup>1,2</sup>

10  
11 1. School of Health Sciences, Faculty of Medicine and Health, University of New South Wales,  
12 Sydney, Australia

13 2. Centre for Pain IMPACT, Neuroscience Research Australia, Sydney, Australia

14 3. Department of Epidemiology, University of Pittsburgh, Pittsburgh, United States of America

15 5. Oxford Population Health, Big Data Institute, University of Oxford, Oxford, UK

16 6. Faculty of Medicine, University of Southampton, Southampton, UK

17 7. Richard A. and Susan F. Smith Center for Outcomes Research, Beth Israel Deaconess  
18 Medical Center and Harvard Medical School, Boston, MA, USA

19 8. CAUSALab, Harvard T.H. Chan School of Public Health, Boston, MA, USA

20 9. Department of Epidemiology, Harvard T.H. Chan School of Public Health, Boston, MA, USA

21 10. Department of Biostatistics, Harvard T.H. Chan School of Public Health, Boston, MA, USA

22 11. Institute of Social and Preventive Medicine, University of Bern, Bern, Switzerland

23 12. Centre for Infectious Disease Epidemiology and Research, Faculty of Health Sciences,  
24 University of Cape Town, Cape Town, South Africa

25 13. Population Health Sciences, Bristol Medical School, University of Bristol, Bristol, UK

26 14. RTI Health Solutions, Barcelona, Spain

27 15. Northwestern University Feinberg School of Medicine, Chicago, IL, USA

28 16. Department of Biostatistics, Boston University School of Public Health, Boston, MA, USA

29 17. Clinical Epidemiology & Biostatistics Unit, Murdoch Children's Research Institute, Royal  
30 Children's Hospital, 50 Flemington Rd, Parkville, Melbourne, VIC, Australia

31 18. Department of Paediatrics, The University of Melbourne, Parkville, Australia

- 1  
2  
3  
4 32 19. School of Population Health, Faculty of Medicine and Health, UNSW Sydney, Sydney,  
5 33 Australia  
6  
7 34 20. Division of Pharmacoepidemiology, Department of Medicine, Brigham & Women's Hospital,  
8 35 Harvard Medical School, Boston, MA, USA  
9  
10 36 21. Department of Population Health Sciences, Bristol Medical School, University of Bristol, UK  
11 37 22. NIHR Bristol Biomedical Research Centre, UK  
12  
13 38 23. Health Data Research UK South-West, Bristol, UK  
14  
15 39 24. Department of Public Health and Epidemiology, RCSI University of Medicine and Health  
16 40 Sciences, Dublin, Ireland  
17  
18 41 25. Department of Mental Health, Johns Hopkins Bloomberg School of Public Health, Baltimore,  
19 42 MD, USA  
20  
21 43 26. University of Exeter Medical School, Exeter, UK  
22  
23 44  
24  
25 45  
26  
27 46

28  
29 47 **Corresponding Author**

30 48 Harrison J Hansford

31 49 E: [h.hansford@unsw.edu.au](mailto:h.hansford@unsw.edu.au)

32 50 School of Health Sciences, UNSW Sydney,  
33 51 2052, Sydney, Australia  
34  
35  
36  
37  
38  
39 52

40  
41 53 **Words: 2247**  
42  
43  
44 54  
45  
46  
47  
48  
49  
50  
51  
52  
53  
54  
55  
56  
57  
58  
59  
60

1  
2  
3  
4 55 **Abstract**  
5  
6  
7

8  
9  
10  
11 56

12  
13  
14  
15  
16  
17  
18  
19  
20  
21  
22 57 **Background**

23  
24  
25  
26  
27  
28  
29  
30  
31  
32  
33  
34  
35  
36  
37  
38  
39  
40  
41  
42  
43  
44  
45  
46  
47  
48  
49  
50  
51  
52  
53  
54  
55  
56  
57  
58  
59  
60  
61  
62  
63  
64  
65  
66  
67  
68  
69  
70  
71  
72  
73  
74  
75  
76  
77  
78  
79  
80  
81  
82  
83  
84  
85  
86  
87  
88  
89  
90  
91  
92  
93  
94  
95  
96  
97  
98  
99  
100  
101  
102  
103  
104  
105  
106  
107  
108  
109  
110  
111  
112  
113  
114  
115  
116  
117  
118  
119  
120  
121  
122  
123  
124  
125  
126  
127  
128  
129  
130  
131  
132  
133  
134  
135  
136  
137  
138  
139  
140  
141  
142  
143  
144  
145  
146  
147  
148  
149  
150  
151  
152  
153  
154  
155  
156  
157  
158  
159  
160  
161  
162  
163  
164  
165  
166  
167  
168  
169  
170  
171  
172  
173  
174  
175  
176  
177  
178  
179  
180  
181  
182  
183  
184  
185  
186  
187  
188  
189  
190  
191  
192  
193  
194  
195  
196  
197  
198  
199  
200  
201  
202  
203  
204  
205  
206  
207  
208  
209  
210  
211  
212  
213  
214  
215  
216  
217  
218  
219  
220  
221  
222  
223  
224  
225  
226  
227  
228  
229  
230  
231  
232  
233  
234  
235  
236  
237  
238  
239  
240  
241  
242  
243  
244  
245  
246  
247  
248  
249  
250  
251  
252  
253  
254  
255  
256  
257  
258  
259  
260  
261  
262  
263  
264  
265  
266  
267  
268  
269  
270  
271  
272  
273  
274  
275  
276  
277  
278  
279  
280  
281  
282  
283  
284  
285  
286  
287  
288  
289  
290  
291  
292  
293  
294  
295  
296  
297  
298  
299  
300  
301  
302  
303  
304  
305  
306  
307  
308  
309  
310  
311  
312  
313  
314  
315  
316  
317  
318  
319  
320  
321  
322  
323  
324  
325  
326  
327  
328  
329  
330  
331  
332  
333  
334  
335  
336  
337  
338  
339  
340  
341  
342  
343  
344  
345  
346  
347  
348  
349  
350  
351  
352  
353  
354  
355  
356  
357  
358  
359  
360  
361  
362  
363  
364  
365  
366  
367  
368  
369  
370  
371  
372  
373  
374  
375  
376  
377  
378  
379  
380  
381  
382  
383  
384  
385  
386  
387  
388  
389  
390  
391  
392  
393  
394  
395  
396  
397  
398  
399  
400  
401  
402  
403  
404  
405  
406  
407  
408  
409  
410  
411  
412  
413  
414  
415  
416  
417  
418  
419  
420  
421  
422  
423  
424  
425  
426  
427  
428  
429  
430  
431  
432  
433  
434  
435  
436  
437  
438  
439  
440  
441  
442  
443  
444  
445  
446  
447  
448  
449  
450  
451  
452  
453  
454  
455  
456  
457  
458  
459  
460  
461  
462  
463  
464  
465  
466  
467  
468  
469  
470  
471  
472  
473  
474  
475  
476  
477  
478  
479  
480  
481  
482  
483  
484  
485  
486  
487  
488  
489  
490  
491  
492  
493  
494  
495  
496  
497  
498  
499  
500  
501  
502  
503  
504  
505  
506  
507  
508  
509  
510  
511  
512  
513  
514  
515  
516  
517  
518  
519  
520  
521  
522  
523  
524  
525  
526  
527  
528  
529  
530  
531  
532  
533  
534  
535  
536  
537  
538  
539  
540  
541  
542  
543  
544  
545  
546  
547  
548  
549  
550  
551  
552  
553  
554  
555  
556  
557  
558  
559  
560  
561  
562  
563  
564  
565  
566  
567  
568  
569  
570  
571  
572  
573  
574  
575  
576  
577  
578  
579  
580  
581  
582  
583  
584  
585  
586  
587  
588  
589  
590  
591  
592  
593  
594  
595  
596  
597  
598  
599  
600  
601  
602  
603  
604  
605  
606  
607  
608  
609  
610  
611  
612  
613  
614  
615  
616  
617  
618  
619  
620  
621  
622  
623  
624  
625  
626  
627  
628  
629  
630  
631  
632  
633  
634  
635  
636  
637  
638  
639  
640  
641  
642  
643  
644  
645  
646  
647  
648  
649  
650  
651  
652  
653  
654  
655  
656  
657  
658  
659  
660  
661  
662  
663  
664  
665  
666  
667  
668  
669  
670  
671  
672  
673  
674  
675  
676  
677  
678  
679  
680  
681  
682  
683  
684  
685  
686  
687  
688  
689  
690  
691  
692  
693  
694  
695  
696  
697  
698  
699  
700  
701  
702  
703  
704  
705  
706  
707  
708  
709  
710  
711  
712  
713  
714  
715  
716  
717  
718  
719  
720  
721  
722  
723  
724  
725  
726  
727  
728  
729  
730  
731  
732  
733  
734  
735  
736  
737  
738  
739  
740  
741  
742  
743  
744  
745  
746  
747  
748  
749  
750  
751  
752  
753  
754  
755  
756  
757  
758  
759  
760  
761  
762  
763  
764  
765  
766  
767  
768  
769  
770  
771  
772  
773  
774  
775  
776  
777  
778  
779  
780  
781  
782  
783  
784  
785  
786  
787  
788  
789  
790  
791  
792  
793  
794  
795  
796  
797  
798  
799  
800  
801  
802  
803  
804  
805  
806  
807  
808  
809  
810  
811  
812  
813  
814  
815  
816  
817  
818  
819  
820  
821  
822  
823  
824  
825  
826  
827  
828  
829  
830  
831  
832  
833  
834  
835  
836  
837  
838  
839  
840  
841  
842  
843  
844  
845  
846  
847  
848  
849  
850  
851  
852  
853  
854  
855  
856  
857  
858  
859  
860  
861  
862  
863  
864  
865  
866  
867  
868  
869  
870  
871  
872  
873  
874  
875  
876  
877  
878  
879  
880  
881  
882  
883  
884  
885  
886  
887  
888  
889  
890  
891  
892  
893  
894  
895  
896  
897  
898  
899  
900  
901  
902  
903  
904  
905  
906  
907  
908  
909  
910  
911  
912  
913  
914  
915  
916  
917  
918  
919  
920  
921  
922  
923  
924  
925  
926  
927  
928  
929  
930  
931  
932  
933  
934  
935  
936  
937  
938  
939  
940  
941  
942  
943  
944  
945  
946  
947  
948  
949  
950  
951  
952  
953  
954  
955  
956  
957  
958  
959  
960  
961  
962  
963  
964  
965  
966  
967  
968  
969  
970  
971  
972  
973  
974  
975  
976  
977  
978  
979  
980  
981  
982  
983  
984  
985  
986  
987  
988  
989  
990  
991  
992  
993  
994  
995  
996  
997  
998  
999  
1000

Observational studies are increasingly used to inform health decision-making when randomised trials are not feasible, ethical, or timely. The target trial approach provides a framework to help minimise common biases in observational studies that aim to estimate the causal effect of interventions. Incomplete reporting of studies using the target trial framework limits the ability for clinicians, researchers, patients, and other decision-makers to appraise, synthesise, and interpret findings to inform clinical and public health practice and policy. This paper describes the methods that we will use to develop the transparent reporting of observational studies emulating a target trial (TARGET) reporting guideline.

68 **Methods/design**

69 The TARGET reporting guideline will be developed in five stages following  
70 recommended guidance. The first stage will identify target trial reporting practices by  
71 systematically reviewing published studies that explicitly emulated a target trial. The  
72 second stage will identify and refine items to be considered for inclusion in the  
73 TARGET guideline by consulting content experts using sequential online surveys. The  
74 third stage will prioritise and consolidate key items to be included in the TARGET  
75 guideline at an in-person consensus meeting of TARGET investigators. The fourth  
76 stage will produce and pilot-test both the TARGET guideline and explanation and

1  
2  
3  
4 77 elaboration document with relevant stakeholders. The fifth stage will disseminate the  
5  
6 78 TARGET guideline and resources via journals, conferences, and courses.  
7  
8

9 79

## 10 11 80 **Ethics and Dissemination**

12  
13  
14 81 Ethical approval for the survey has been attained (HC220536). The TARGET guideline  
15  
16 82 will be disseminated widely in partnership with stakeholders to maximise adoption and  
17  
18  
19 83 improve reporting of these studies.  
20

21  
22 84

23  
24 85 **Key words:** target trial emulation, causal inference, reporting guideline, observational  
25  
26  
27 86 studies  
28

29  
30 87

## 31 32 88 **Strengths and Limitations**

- 33  
34  
35 89 - The TARGET reporting guideline will be developed according to  
36  
37 90 recommendations for health research reporting guidelines  
38  
39  
40 91 - The TARGET working group has been established to include stakeholders  
41  
42 92 from a variety of backgrounds  
43  
44  
45 93 - A comprehensive piloting phase may increase the usability and uptake of the  
46  
47 94 reporting guideline  
48  
49

50  
51 95  
52  
53  
54  
55  
56  
57  
58  
59  
60

## 96 Introduction

97 Observational studies can provide evidence on the causal effects of interventions  
98 when it is not feasible, ethical, or timely to conduct a relevant randomised trial.

99 However, making causal inferences from observational data is challenging due to  
100 confounding and design-related biases such as selection bias and immortal time bias.

101 (1,2) Design-related biases can be avoided using the target trial framework. (3,4) The  
102 framework involves the specification of the hypothetical randomised pragmatic trial —  
103 the target trial — that would ideally be conducted and how this trial might be emulated  
104 using observational data. (3,4) The two stages of the target trial framework are 1)  
105 specification of the target trial, and 2) emulation of the target trial. (3,4) Using  
106 observational data to mimic a randomised experiment was proposed in the mid 20<sup>th</sup>  
107 century, (5-8) and extended to time-varying treatments by Robins in 1986. (9)

108  
109 The value of using the target trial framework to design the analysis of observational  
110 studies has been recognised by international regulatory bodies in the field of medicine  
111 and health, (10-14) and the framework underpins the widely-used ROBINS-I tool for  
112 assessing risk of bias in non-randomised studies of interventions. (15) Studies that are  
113 explicit in using the target trial framework have been published with increasing  
114 frequency in leading general medical and specialty journals. (16-23)

115  
116 Application of the target trial framework requires the complete specification of the  
117 target trial protocol and its emulation (Figure 1). (3) Hernán & Robins (3) provide a

1  
2  
3  
4 118 template for specifying a target trial and its emulation; however, there is currently no  
5  
6 119 detailed guidance on reporting a study designed to emulate a target trial. Incomplete  
7  
8  
9 120 reporting of these studies limits the ability of clinicians, researchers, patients, and other  
10  
11 121 decision-makers to appraise and synthesise findings or interpret them to inform clinical  
12  
13  
14 122 and public health practice and policy. A reporting guideline that expands upon the  
15  
16 123 initial target trial emulation template(3) is needed to provide authors with  
17  
18  
19 124 comprehensive recommendations on how to completely and transparently report a  
20  
21  
22 125 study emulating a target trial.  
23  
24  
25 126  
26  
27 127  
28  
29  
30 128 **[INSERT FIGURE 1]**  
31  
32 129  
33  
34

35 130 To address this gap, we outline the processes and methods that used to develop a  
36  
37 131 reporting guideline for studies emulating a target trial – TARGET (Transparent  
38  
39  
40 132 reporting of observational studies emulating a target trial).  
41  
42  
43 133  
44

#### 45 134 **Objective**

46  
47  
48 135 The objective of the TARGET guideline is to provide guidance on the minimum set of  
49  
50 136 items that should be reported to provide a clear and transparent account of  
51  
52  
53 137 observational studies that investigate the comparative effectiveness and safety of  
54  
55  
56 138 health interventions explicitly using the target trial framework.  
57  
58  
59 139  
60



## 140 **Methods**

141 We will develop the TARGET Guideline in five stages following recommendations for  
142 the development of health research reporting guidelines (Figure 2). (24) The start date  
143 for the study was late 2022, with the planned end date early 2025.

144  
145 **[INSERT FIGURE 2]**

### 147 **TARGET working group**

148 The TARGET working group is made up of the steering committee and project team  
149 (Supplementary Material 1). The group was established to collate expertise on target  
150 trial emulation methodology, epidemiology, clinical trials, biostatistics, reporting  
151 guideline development, and knowledge of regulatory and journal editorial processes.  
152 The working group will oversee recruitment of participants for Stages 2 and 3 and  
153 contribute to writing and disseminating the guideline documents.

### 155 **Stage 1: Identify current reporting practices**

156 The systematic review aims to assess whether and how important items are reported  
157 by published studies explicitly emulating a target trial and whether reporting guidance  
158 (e.g., STROBE(25)) was used. The protocol for this systematic review was registered  
159 on the Open Science Framework on 13 March 2022 ([osf.io/uj56m](https://osf.io/uj56m)).

160  
161 *Databases, eligibility, and search terms*

1  
2  
3  
4 162 We will search Medline, EMBASE, PsycINFO and Science Citation Index for  
5  
6 163 observational studies that stated in their methods that they explicitly emulated a target  
7  
8 164 trial. We will exclude studies not written in English, not in the field of medicine and  
9  
10  
11 165 health, not conducted in humans, or not observational designs. Many observational  
12  
13  
14 166 studies may implicitly use the framework of a randomised trial. However, to be  
15  
16 167 included in this review studies must be explicit in their attempt to emulate a target trial  
17  
18  
19 168 (e.g., stated 'target trial emulation' in the article). To identify eligible studies, we  
20  
21  
22 169 developed a literature search in collaboration with an expert librarian at the University  
23  
24  
25 170 of Oxford. Our approach used sensitive search terms including emulat\*, target trial,  
26  
27 171 observational data, real-world data, comparative effectiveness, and causal inference,  
28  
29  
30 172 to try to capture all papers explicitly emulating a target trial. The complete search  
31  
32  
33 173 strategy is in Supplementary Material 2. We will conduct forward citation tracking of  
34  
35 174 selected seminal articles to maximise the chance of retrieving all relevant articles.  
36  
37 175 (3,9,26-28) We will also include papers known to the authorship team. In duplicate,  
38  
39  
40 176 independent reviewers will conduct title, abstract, and full text screening. We will  
41  
42  
43 177 resolve disagreements between reviewers through discussion.  
44

45 178

#### 48 179 *Data Extraction*

49  
50 180 We will extract items regarded by the steering committee as potentially important for  
51  
52  
53 181 the reporting of a target trial emulation, including those outlined by Hernán and Robins,  
54  
55  
56 182 2016. (3) Two independent reviewers will extract information on study authors, year of  
57  
58  
59 183 publication, journal, sub-field of medicine, study design, sample size, intervention,  
60

1  
2  
3  
4 184 comparison group, outcomes assessed, and whether the study was prospectively  
5  
6 185 registered. We will extract items relevant to the methods and results of the target trial  
7  
8  
9 186 emulation, including whether and how all components of the protocol of the proposed  
10  
11 187 target trial, and how they were emulated, were specified (i.e., eligibility criteria,  
12  
13  
14 188 treatment strategies, assignment procedures, follow-up period, outcome(s), causal  
15  
16 189 contrast(s), and data analysis plan). We will enter data into a standardised data  
17  
18  
19 190 extraction form which two authors will pilot with a selection of included studies. We will  
20  
21  
22 191 resolve disagreements in data extraction between reviewers through discussion, or  
23  
24 192 where necessary, consultation with a third reviewer.  
25  
26  
27 193

#### 28 29 194 *Data analysis*

30  
31  
32 195 We will use R (29) for all data analyses. Categorical variables will be summarised  
33  
34  
35 196 using frequencies and percentages. Continuous variables will be summarised using  
36  
37  
38 197 mean and standard deviation, or median and interquartile range, as appropriate.  
39

40 198

#### 41 42 43 199 *Outcomes of the systematic review*

44  
45 200 The systematic review will provide evidence on reporting in studies explicitly emulating  
46  
47  
48 201 a target trial. We acknowledge that excluding studies not written in English and  
49  
50  
51 202 unpublished studies may cause potentially relevant articles to be excluded. The  
52  
53 203 findings will inform the online surveys (Stage 2) and the consensus meeting (Stage 3).  
54  
55  
56 204 We will submit the findings of this review for publication and all data and code made  
57  
58 205 publicly available.  
59  
60

206

**207 Stage 2: Identify and refine items for the TARGET guideline**

208 We will conduct two online surveys to generate a list of candidate items that add detail  
209 to each of the protocol elements in Figure 1.

210

*211 Ethics*

212 Ethical approval has been obtained for the online surveys from the University of New  
213 South Wales Human Research Ethics Committee (HC220536).

214

*215 Selection of initial items*

216 The steering group will develop a list of key items, informed by the systematic review  
217 (Stage 1), and the target trial framework described by Hernán & Robins, (3) thought  
218 important for the conduct and reporting target trial emulations (Figure 1). Other  
219 potential sources of items include: published guidance for observational studies and  
220 randomised controlled trials, the ROBINS-I tool, (15) and studies that describe items  
221 that may be important for the conduct or reporting of target trial emulations.

222

*223 Participants*

224 Members of the TARGET working group (Supplementary Material 1) will be invited to  
225 participate in the surveys.

226

*227 Procedure*

1  
2  
3  
4 228 We will host two online surveys using REDCap. (30,31) We will send each online  
5  
6 229 survey via email to the participants. We will ask participants to rate the importance of  
7  
8 230 each potential reporting item on a 9-point Likert scale (1, “not important”, to 9, “critically  
9  
10 231 important”). Participants will have the opportunity to provide suggestions or  
11  
12 232 modifications to the wording of items as well as suggest additional items or make other  
13  
14 233 comments.  
15  
16  
17  
18

19 234  
20  
21 235 In the second survey, we will send participants a summary of the results for each  
22  
23 236 potential reporting item (mean scores and standard deviations, median scores and  
24  
25 237 interquartile ranges, and histograms), their own score for each item, and any  
26  
27 238 comments from participants on each item from the first survey. We will also present  
28  
29 239 any new items and suggested modifications to items. We will then invite participants  
30  
31 240 to re-score the importance of each item, and score any additional items, considering  
32  
33 241 the aggregated ratings. Participants will have the opportunity to provide additional  
34  
35 242 feedback on each item in the form of open ended responses.  
36  
37  
38  
39  
40  
41  
42

43 243

#### 44 244 *Analysis*

45  
46  
47 245 Continuous variables will be summarised using mean and standard deviation, or  
48  
49 246 median and interquartile range, as appropriate. We will analyse the free-text  
50  
51 247 responses from the first and second surveys using an inductive approach, (32) in  
52  
53 248 which we will use reflexive thematic (32) analysis to identify, organise and generate  
54  
55 249 codes, and then identify themes found within the dataset. Briefly, inductive coding is a  
56  
57  
58  
59  
60

1  
2  
3  
4 250 process pooling common ideas without trying to fit ideas/codes into a pre-existing  
5  
6 251 framework. These data will contribute to the creation of new items and modification of  
7  
8  
9 252 existing items to be included in the subsequent survey.

10  
11 253

12  
13  
14 254 *Outcome of the online surveys*

15  
16 255 We will generate a preliminary list of items with corresponding ratings of importance  
17  
18  
19 256 to be considered in the TARGET guideline at the consensus meeting (Stage 3). We  
20  
21  
22 257 will also generate qualitative insights to guide item refinement and prioritisation in  
23  
24  
25 258 preparation for the consensus meeting.

26  
27 259

28  
29  
30 260 **Stage 3 – Consolidate and prioritise key items to be included in the TARGET guideline**

31  
32 261 A consensus meeting will finalise reporting items for the TARGET guideline. (24) The  
33  
34  
35 262 consensus meeting will follow suggested methods for developing reporting guidelines,  
36  
37  
38 263 (24) including guidance for consensus-based methods currently being developed  
39  
40 264 which we will use if they become available. (33)

41  
42  
43 265

44  
45 266 *Process*

46  
47  
48 267 We will invite stakeholders identified by the working group to participate in a two-day  
49  
50  
51 268 consensus meeting. The TARGET working group will ensure that the expertise of  
52  
53  
54 269 consensus meeting participants includes target trial emulation methodology,  
55  
56 270 epidemiology, clinical trials, biostatistics, reporting guideline development, and  
57  
58 271 regulatory and journal editorial processes. Prior to the consensus meeting, the core  
59  
60

1  
2  
3  
4 272 team will provide attendees with evidence from the systematic review (Stage 1) and  
5  
6 273 findings from the online surveys (Stage 2) including a draft of the items proposed for  
7  
8  
9 274 inclusion in the guideline. We will present the findings from Stage 1 and 2 at the  
10  
11 275 consensus meeting. A member of the TARGET working group will facilitate a  
12  
13  
14 276 structured discussion on the rationale for including items from the online surveys. If  
15  
16  
17 277 there are disagreements, they will first be debated and, if disagreements remain, we  
18  
19 278 will hold an anonymised vote to establish the importance of including the item in the  
20  
21  
22 279 guideline. For the anonymised vote, a simple majority will be sufficient to guide the  
23  
24  
25 280 inclusion/exclusion of an item. The meeting will conclude with discussion about the  
26  
27 281 content and production of relevant documents (TARGET guideline, draft explanation  
28  
29 282 and elaboration document) as well as strategies for dissemination and implementation.  
30  
31  
32 283 Following the conclusion of the consensus meeting, we will circulate a report on the  
33  
34  
35 284 outcome to the meeting participants for review and approval.  
36  
37  
38  
39

40 286 **Stage 4 – Development and piloting of the draft TARGET guideline and explanation**  
41  
42 287 **and elaboration document**  
43  
44

45 288 Stage 4 involves drafting the TARGET guideline and accompanying explanation and  
46  
47  
48 289 elaboration document to ensure that the wording and content of the documents are  
49  
50  
51 290 clear, precise, and suitable for all identified stakeholders. The purpose of the  
52  
53 291 explanation and elaboration document is to explain each item by providing background  
54  
55  
56 292 information, a rationale, and clear reporting examples from published target trial  
57  
58 293 emulations. We will design the explanation and elaboration document to facilitate  
59  
60

1  
2  
3  
4 294 adherence to the TARGET guideline by clarifying the importance of each item,  
5  
6 295 highlighting relevant reporting issues and providing examples to assist authors using  
7  
8  
9 296 the guideline. The consensus meeting participants may be asked to review and  
10  
11 297 comment on the draft TARGET guideline and explanation and elaboration document.  
12  
13

14 298

15  
16 299 We will evaluate the TARGET guideline by piloting the proposed guideline and the  
17  
18  
19 300 explanation and elaboration document with 20-30 expert methodologists and potential  
20  
21  
22 301 users of TARGET, identified from TARGET working group networks. We will ask  
23  
24  
25 302 participants to provide general feedback on accessibility and usability, and to identify  
26  
27 303 possible reporting items that might have been overlooked. We will also ask for specific  
28  
29  
30 304 feedback about the utility and clarity of each TARGET item. We will collect data  
31  
32 305 through online surveys, hosted by REDCap. (30,31) We will incorporate feedback from  
33  
34  
35 306 the piloting exercise into the final guideline and explanation and elaboration document,  
36  
37 307 as required. If suggested revisions are extensive, we will conduct a further round of  
38  
39  
40 308 piloting.  
41

42  
43 309

#### 44 45 310 *Patient and public involvement*

46  
47  
48 311 Potential users of this research include health researchers conducting observational  
49  
50 312 analyses, regulatory bodies, public health and other health decision-makers. We aim  
51  
52  
53 313 to include relevant decision-makers in the piloting phase of the guideline development  
54  
55  
56 314 process to maximise the usefulness and uptake of the TARGET guideline. Participants  
57  
58  
59  
60



1  
2  
3  
4 315 in any stage of the guideline development will be informed of the results and final  
5  
6 316 guidance.  
7

8  
9 317

## 10 11 318 **Stage 5 – Guideline implementation**

12  
13  
14 319 The goal of the final stage of guideline development is to maximise reach and use of  
15  
16 320 the TARGET guideline. The TARGET working group will guide the dissemination  
17  
18 321 strategy with advice from consensus meeting participants. We aim to publish the  
19  
20 322 TARGET guideline and the explanation and elaboration document and disseminate  
21  
22 323 the findings through traditional and social media. We will engage journal editors and  
23  
24 324 funding agencies to encourage TARGET guideline endorsement alongside other  
25  
26 325 published reporting guidance. We will publicly host the TARGET guideline and  
27  
28 326 explanation and elaboration paper, and any other relevant material on a TARGET  
29  
30 327 website. We will index the guideline on the Enhancing the QUALity and Transparency  
31  
32 328 Of health Research (EQUATOR) Network website. (34,35) We will create online  
33  
34 329 resources including infographics, blog posts and podcasts, which will be available on  
35  
36 330 the TARGET website. We will share the TARGET guideline with authors in the field,  
37  
38 331 and at relevant scientific conferences and methodological courses.  
39  
40  
41  
42  
43  
44  
45  
46  
47  
48  
49  
50  
51  
52  
53  
54  
55  
56  
57  
58  
59  
60

1  
2  
3  
4 332 **Declarations**

5  
6 333

7  
8  
9 334 **Ethics approval and consent to participate**

10  
11 335 Not Applicable

12  
13  
14 336

15  
16 337 **Consent for publication**

17  
18  
19 338 All authors consent to publication of this manuscript

20  
21  
22 339

23  
24 340 **Availability of data and materials**

25  
26  
27 341 Not applicable

28  
29  
30 342

31  
32 343 **Funding**

33  
34  
35 344 There was no specific funding for this study. HJH was supported by an Australian

36  
37 345 National Health and Medical Research Council (NHMRC) Postgraduate Scholarship,

38  
39  
40 346 a PhD Top-Up Scholarship from Neuroscience Research Australia, and was a

41  
42 347 Neuroscience Research Australia PhD Pearl sponsored by Paul Salteri AO. AGC

43  
44  
45 348 was supported by an Australian NHMRC Investigator Grant (ID 2010088). MM-B was

46  
47  
48 349 supported by an Australian NHMRC Investigator Grant (ID 2009572). JMH was

49  
50  
51 350 supported by an Australian NHMRC Investigator Grant (ID 2010128). BAD was

52  
53 351 supported by a grant from the National Institutes of Health (R00 CA248335). ME was

54  
55  
56 352 supported by grants from the National Institutes of Health (R01 AI152772-01, 5U01-

57  
58 353 AI069924-05) and the Swiss National Science Foundation (32FP30-174281). NI was

59  
60

1  
2  
3  
4 354 supported by grants from the National Institute for Health and Care Research  
5  
6 355 (HDRUK2022.0313) and the UK Office for National Statistics (2002563). MAH was  
7  
8  
9 356 supported by NIH grant R37 AI102634.  
10

11 357

### 14 358 **Competing interests**

16 359 All authors declare no competing interests.

19 360

### 22 361 **Author Contributions**

24 362 HJH, AGC, MDJ, HL, JHM, conceived the idea for the project protocol. All authors  
25  
26  
27 363 contributed to the design and methodology of the project protocol. HJH and AGC wrote  
28  
29  
30 364 the first draft of the manuscript. MAH, SAS, IJD, BAD, XG-A, ME, RMG, NI, SL, MM-  
31  
32 365 B, SAP, SS, JACS, MKS, EAS provided feedback, revised the manuscript and have  
33  
34  
35 366 read and approved the final version.  
36

37 367

### 40 368 **Acknowledgements**

42 369 We acknowledge Nia Roberts, outreach librarian and information specialist at the  
43  
44  
45 370 University of Oxford for assistance designing the literature search.  
46  
47  
48  
49  
50  
51  
52  
53  
54  
55  
56  
57  
58  
59  
60

1  
2  
3  
4 372 **Abbreviations**

5 373

6  
7  
8 374 **EQUATOR:** Enhancing the QUALity and Transparency Of health Research

9  
10 375 **REDCap:** Research Electronic Data Capture

11  
12  
13 376 **STROBE:** Strengthening the Reporting of Observational Studies in Epidemiology

14  
15  
16 377 **TARGET:** TrAnSPARENT ReportinG of studies Emulating a Target trial

17  
18 378

19  
20  
21 379 **Figure Captions**

22  
23 380

24  
25  
26 381 Figure 1: Elements relevant to both the specification and emulation of the target trial  
27  
28 382 described by Hernán & Robins (3)

29  
30  
31 383 Figure 2: Workflow for the development of the TARGET guideline

32  
33 384

34  
35 385

36  
37 386

387 **References**

- 388 1. Hernán MA, Sauer BC, Hernández-Díaz S, et al. Specifying a target trial prevents immortal  
389 time bias and other self-inflicted injuries in observational analyses. *J Clin Epidemiol*  
390 2016;79:70-75. doi: 10.1016/j.jclinepi.2016.04.014 [published Online First:  
391 2016/05/31]
- 392 2. Dickerman BA, García-Albéniz X, Logan RW, et al. Avoidable flaws in observational  
393 analyses: an application to statins and cancer. *Nature Medicine* 2019;25(10):1601-  
394 06. doi: 10.1038/s41591-019-0597-x
- 395 3. Hernán MA, Robins JM. Using big data to emulate a target trial when a randomized trial is  
396 not available. *American journal of epidemiology* 2016;183(8):758-64.
- 397 4. Hernán MA. Methods of public health research—strengthening causal inference from  
398 observational data. *New England Journal of Medicine* 2021;385(15):1345-48.
- 399 5. Cochran WG. Observational studies. *Statistical papers in honor of George W Snedecor*  
400 1972:77-90.
- 401 6. Dorn HF. Philosophy of inferences from retrospective studies. *American Journal of Public*  
402 *Health and the Nations Health* 1953;43(6\_Pt\_1):677-83.
- 403 7. Rubin DB. Estimating causal effects of treatments in randomized and nonrandomized  
404 studies. *Journal of Educational Psychology* 1974;66(5):688.
- 405 8. Wold H. Causality and econometrics. *Econometrica: Journal of the Econometric Society*  
406 1954:162-77.
- 407 9. Robins J. A new approach to causal inference in mortality studies with a sustained  
408 exposure period—application to control of the healthy worker survivor effect.  
409 *Mathematical Modelling* 1986;7(9-12):1393-512.
- 410 10. Concato J, Stein P, Dal Pan GJ, et al. Randomized, observational, interventional, and  
411 real-world—What's in a name? *Pharmacoepidemiology and Drug Safety*  
412 2020;29(11):1514-17.
- 413 11. Agency EM. European medicines agencies network strategy to 2025. The Netherlands:  
414 Health of Medicines Agencies, 2020.
- 415 12. Excellence NifHaC. The NICE strategy 2021 to 2026, 2021.
- 416 13. Health Canada. Optimizing the Use of Real World Evidence to Inform Regulatory  
417 Decision-Making: Government of Canada, 2019.
- 418 14. Therapeutic Goods Administration. Real world evidence and patient reported outcomes  
419 in the regulatory context. [https://www.tga.gov.au/review-real-world-evidence-and-](https://www.tga.gov.au/review-real-world-evidence-and-patient-reported-outcomes)  
420 [patient-reported-outcomes](https://www.tga.gov.au/review-real-world-evidence-and-patient-reported-outcomes): Australian Government, Department of Health, 2021.
- 421 15. Sterne JA, Hernán MA, Reeves BC, et al. ROBINS-I: a tool for assessing risk of bias in non-  
422 randomised studies of interventions. *BMJ* 2016;355:i4919. doi: 10.1136/bmj.i4919
- 423 16. Garcia-Albeniz XH, J.: Bretthauer, M.: Hernan, M. A. Effectiveness of screening  
424 colonoscopy to prevent colorectal cancer among medicare beneficiaries aged 70 to  
425 79 years: A prospective observational study. *Annals of Internal Medicine* 2017 doi:  
426 <http://dx.doi.org/10.7326/M16-0758>
- 427 17. Mahévas M, Tran V-T, Roumier M, et al. Clinical efficacy of hydroxychloroquine in  
428 patients with covid-19 pneumonia who require oxygen: observational comparative  
429 study using routine care data. *BMJ* 2020;369:m1844. doi: 10.1136/bmj.m1844
- 430 18. Kaura A, Sterne JAC, Trickey A, et al. Invasive versus non-invasive management of older  
431 patients with non-ST elevation myocardial infarction (SENIOR-NSTEMI): a cohort

- 1  
2  
3 432 study based on routine clinical data. *The Lancet* 2020;396(10251):623-34. doi:  
4 433 10.1016/S0140-6736(20)30930-2  
5  
6 434 19. Emilsson L, García-Albéniz X, Logan RW, et al. Examining Bias in Studies of Statin  
7 435 Treatment and Survival in Patients With Cancer. *JAMA Oncol* 2018;4(1):63-70. doi:  
8 436 10.1001/jamaoncol.2017.2752  
9  
10 437 20. Chan You S, Krumholz HM, Suchard MA, et al. Comprehensive Comparative Effectiveness  
11 438 and Safety of First-Line  $\beta$ -Blocker Monotherapy in Hypertensive Patients: A Large-  
12 439 Scale Multicenter Observational Study. *Hypertension* 2021;77(5):1528-38. doi:  
13 440 10.1161/hypertensionaha.120.16402 [published Online First: 20210329]  
14 441 21. Caniglia EC, Robins JM, Cain LE, et al. Emulating a trial of joint dynamic strategies: An  
15 442 application to monitoring and treatment of HIV-positive individuals. *Stat Med*  
16 443 2019;38(13):2428-46. doi: 10.1002/sim.8120 [published Online First: 20190318]  
17 444 22. Zuo H, Yu L, Campbell SM, et al. The implementation of target trial emulation for causal  
18 445 inference: a scoping review. *J Clin Epidemiol* 2023 doi: 10.1016/j.jclinepi.2023.08.003  
19 446 [published Online First: 20230808]  
20  
21 447 23. Scola G, Chis Ster A, Bean D, et al. Implementation of the trial emulation approach in  
22 448 medical research: a scoping review. *BMC Medical Research Methodology*  
23 449 2023;23(1):186. doi: 10.1186/s12874-023-02000-9  
24 450 24. Moher D, Schulz KF, Simera I, et al. Guidance for developers of health research reporting  
25 451 guidelines. *PLoS medicine* 2010;7(2):e1000217.  
26  
27 452 25. Von Elm E, Altman DG, Egger M, et al. The Strengthening the Reporting of Observational  
28 453 Studies in Epidemiology (STROBE) statement: guidelines for reporting observational  
29 454 studies. *Bulletin of the World Health Organization* 2007;85:867-72.  
30 455 26. Hernán MA, Sauer BC, Hernández-Díaz S, et al. Specifying a target trial prevents  
31 456 immortal time bias and other self-inflicted injuries in observational analyses. *Journal*  
32 457 *of Clinical Epidemiology* 2016;79:70-75. doi: 10.1016/j.jclinepi.2016.04.014  
33 458 [published Online First: 2016/05/31]  
34 459 27. Hernán MA. How to estimate the effect of treatment duration on survival outcomes  
35 460 using observational data. *Bmj* 2018;360:k182. doi: 10.1136/bmj.k182 [published  
36 461 Online First: 2018/02/09]  
37  
38 462 28. Robins JM, Hernan, M. J. Estimation of the causal effects of time-varying exposures. In:  
39 463 Fitzmaurice G, Davidian M, Verbeke G, et al., eds. *Longitudinal Data Analysis: CRC*  
40 464 *press* 2008.  
41 465 29. R Core Team. R: A language and environment for statistical computing. 2013  
42 466 30. Harris PA, Taylor R, Minor BL, et al. The REDCap consortium: Building an international  
43 467 community of software platform partners. *Journal of Biomedical Informatics*  
44 468 2019;95:103208. doi: <https://doi.org/10.1016/j.jbi.2019.103208>  
45 469 31. Harris PA, Taylor R, Thielke R, et al. Research electronic data capture (REDCap)—A  
46 470 metadata-driven methodology and workflow process for providing translational  
47 471 research informatics support. *Journal of Biomedical Informatics* 2009;42(2):377-81.  
48 472 doi: <https://doi.org/10.1016/j.jbi.2008.08.010>  
49 473 32. Braun V, Clarke V. Using thematic analysis in psychology. *Qualitative Research in*  
50 474 *Psychology* 2006;3(2):77-101. doi: 10.1191/1478088706qp0630a  
51 475 33. Gattrell WT, Hungin AP, Price A, et al. ACCORD guideline for reporting consensus-based  
52 476 methods in biomedical research and clinical practice: a study protocol. *Research*  
53 477 *Integrity and Peer Review* 2022;7(1):3. doi: 10.1186/s41073-022-00122-0  
54  
55  
56  
57  
58  
59  
60

- 1  
2  
3 478 34. The EQUATOR Network. EQUATOR Network - Enhancing the QUALity and Transparency  
4 479 Of health Research 2022 [Available from: <https://www.equator-network.org/2022>.  
5 480  
6 481 35. Simera I, Moher D, Hoey J, et al. A catalogue of reporting guidelines for health research.  
7 481 *European journal of clinical investigation* 2010;40(1):35-53.  
8  
9 482  
10  
11 483  
12  
13  
14  
15  
16  
17  
18  
19  
20  
21  
22  
23  
24  
25  
26  
27  
28  
29  
30  
31  
32  
33  
34  
35  
36  
37  
38  
39  
40  
41  
42  
43  
44  
45  
46  
47  
48  
49  
50  
51  
52  
53  
54  
55  
56  
57  
58  
59  
60

For peer review only

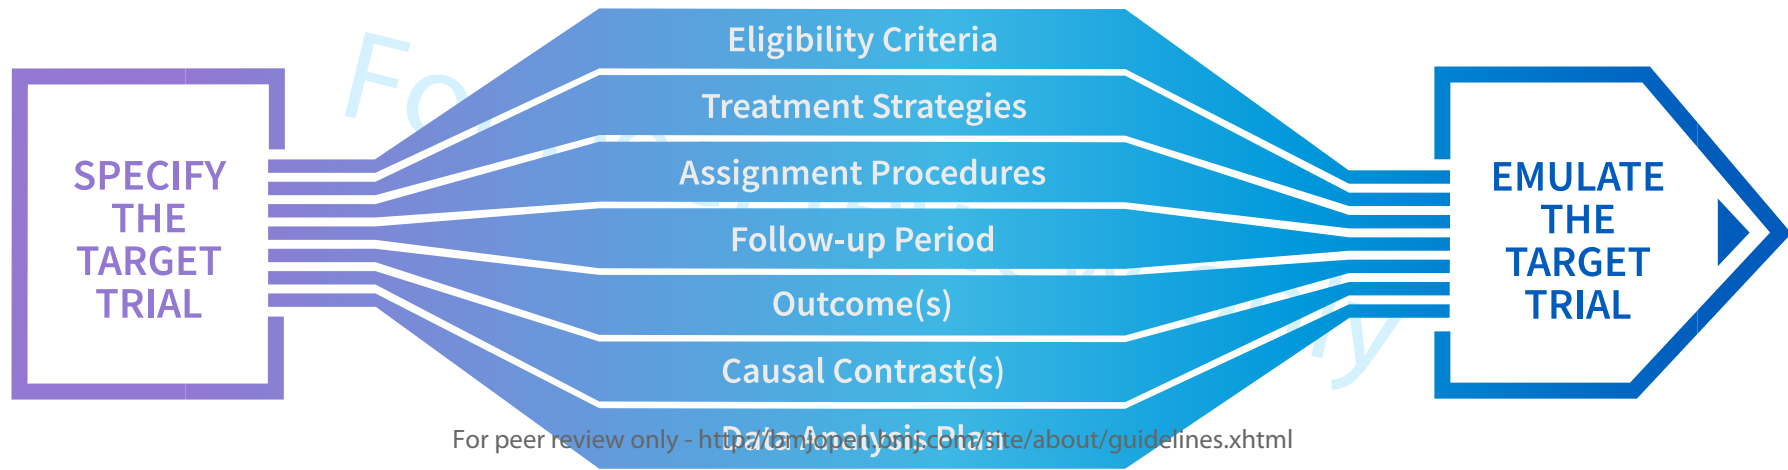



1  
2  
3  
4  
5  
6  
7  
8  
9  
10  
11  
12  
13  
14  
15  
16  
17  
18  
19  
20  
21  
22  
23  
24  
25  
26  
27  
28  
29  
30  
31  
32  
33  
34  
35  
36  
37  
38  
39  
40  
41  
42  
43  
44  
45  
46  
47  
48  
49  
50  
51  
52  
53  
54  
55  
56  
57  
58  
59  
60

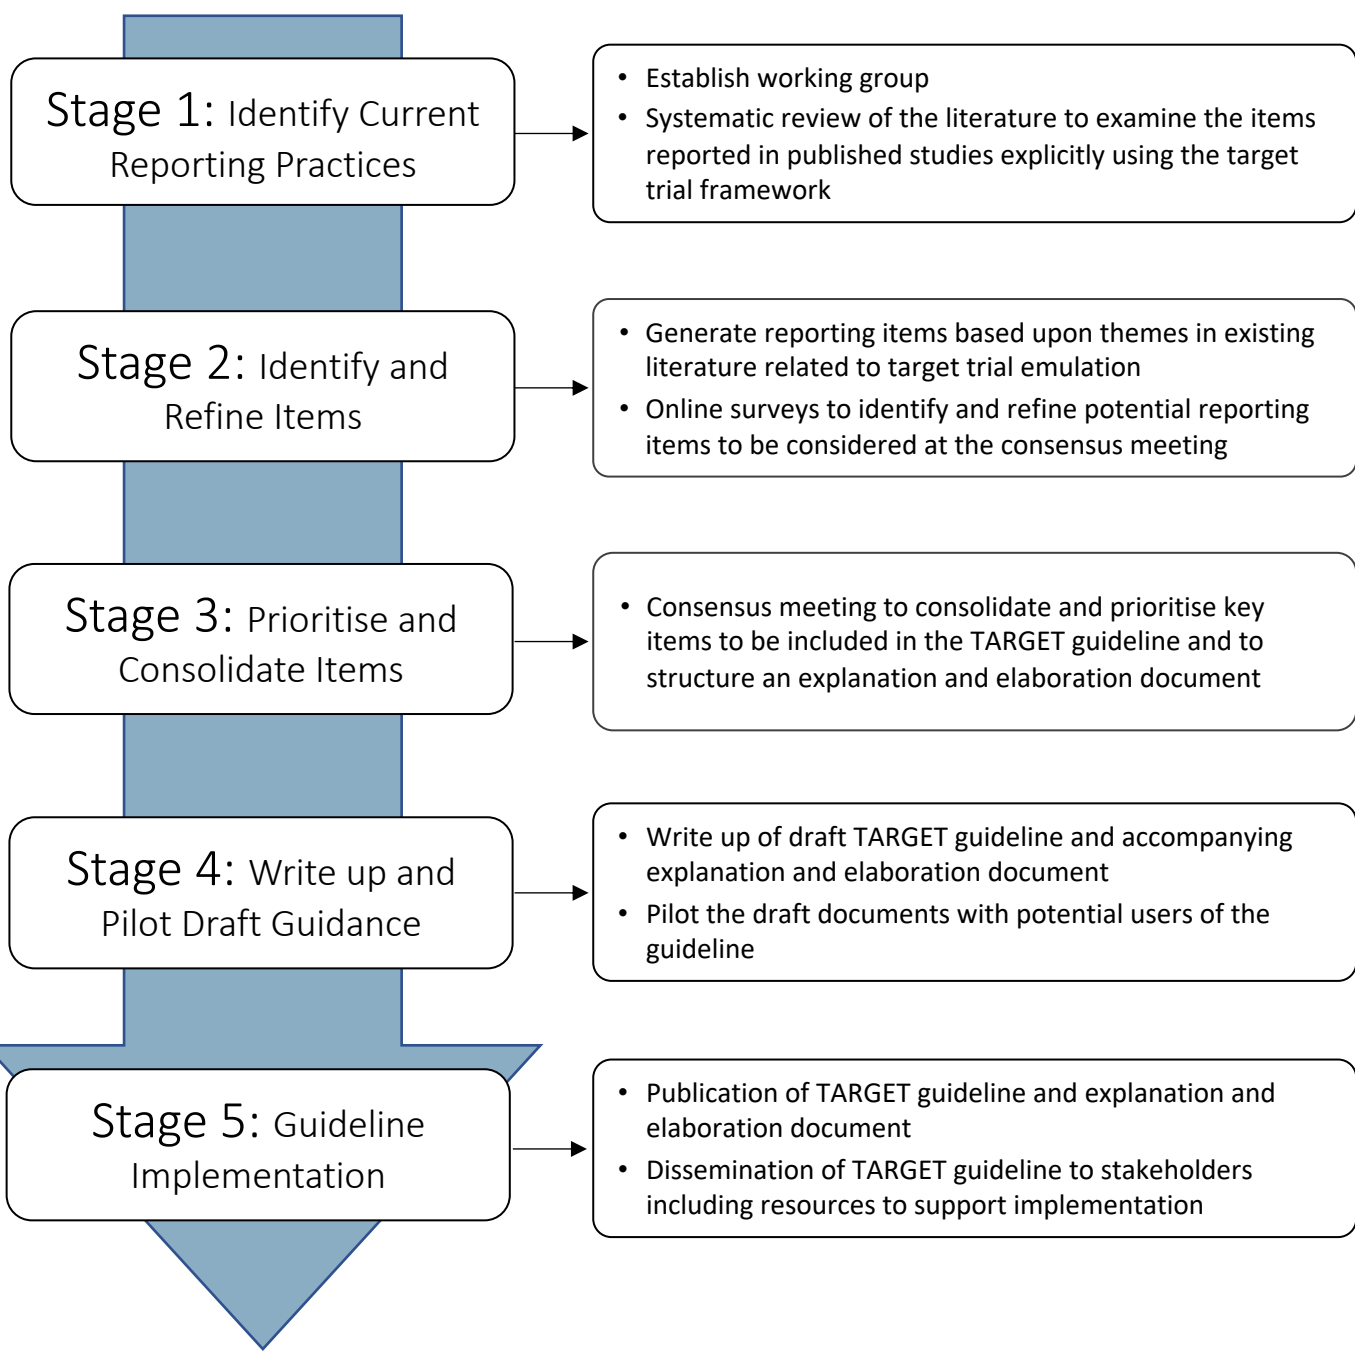

1  
2  
3 1 **Supplementary Material**  
4

5 2  
6  
7 3 **Supplementary Material 1: TARGET working group members (alphabetical)**  
8

9 4  
10 5 *Steering committee*  
11 6 Dr Aidan G. Cashin  
12 7 Mr Harrison J. Hansford  
13 8 Prof Miguel A. Hernán  
14 9 Dr Hopin Lee  
15 10 Dr Matthew D. Jones  
16 11 Prof James H. McAuley  
17 12 A/Prof Sonja A. Swanson  
18  
19

20 13  
21 14 *Project team*  
22 15 A/Prof Issa J. Dahabreh  
23 16 A/Prof Barbra A. Dickerman  
24 17 Prof Matthias Egger  
25 18 Dr Xabier Garcia-Albeniz  
26 19 Prof Robert M. Golub  
27 20 A/Prof Nazrul Islam  
28 21 A/Prof Sara Lodi  
29 22 A/Prof Margarita Moreno-Betancur  
30 23 Prof Sallie A. Pearson  
31 24 Prof Sebastian Schneeweiss  
32 25 Prof Jonathan A. C. Sterne  
33 26 Dr Melissa K. Sharp  
34 27 Prof Elizabeth A. Stuart  
35  
36  
37  
38  
39

30 **Supplementary Material 2: Complete search strategies for all databases**

31

32 **Medline**

- 33 1 (emulat\* adj5 trial?).mp.  
 34 2 (target adj (trial? or experiment?)).mp.  
 35 3. (observational adj (stud\* or research or data)).mp.  
 36 4. ((real world or rwd) adj2 (stud\* or research or data)).mp.  
 37 5. (routine\* adj2 data).mp.  
 38 6. (comparative effectiveness adj2 (stud\* or research or data)).mp.  
 39 7. (emulat\* or propensity score? or (causal adj2 (inference? or analys?s or  
 40 effect\*))).mp.  
 41 8. 3 or 4 or 5 or 6 or 7  
 42 9. 2 and 8  
 43 10. (target adj (trial? or experiment?)).ti.  
 44 11. 1 or 9 or 10  
 45 Filtered for time (2012-2022) manually after search

46

47 **Embase**

- 48 1. (emulat\* adj5 trial?).mp.  
 49 2. (target adj (trial? or experiment?)).mp.  
 50 3. (observational adj (stud\* or research or data)).mp.  
 51 4. ((real world or rwd) adj2 (stud\* or research or data)).mp.  
 52 5. (routine\* adj2 data).mp.  
 53 6. (comparative effectiveness adj2 (stud\* or research or data)).mp.  
 54 7. (emulat\* or propensity score? or (causal adj2 (inference? or analys?s or  
 55 effect\*))).mp.  
 56 8. 3 or 4 or 5 or 6 or 7  
 57 9. 2 and 8  
 58 10. (target adj (trial? or experiment?)).ti.  
 59 11. 1 or 9 or 10

60

61 **psycINFO**

- 62 noft(target trial emulat\*) OR ((noft(real world data) OR (noft(emulat\* trial)) OR  
 63 noft(observational) OR noft(routine\* data)) AND noft(comparative effective\*)  
 64 AND noft(causal infer\*))

65

66 **Web of Science**

- 67 (TI=(emulat\* trial)) OR (TI=(real world data) OR TI=(routine\* data) OR  
 68 TI=(comparative effectiveness study comparative effectiveness research or  
 69 comparative effectiveness data) OR (TI=(emulat\* or propensity score?) AND  
 70 TI=(causal inference or causal analysis or causal effect\*)) AND ALL=(target  
 71 trial or emulat\* or target trial emulation)
