# Supplementary material for: Development of the TrAnsparent ReportinG of observational studies Emulating a Target trial (TARGET) guideline
Source: PubMed Central journal article supplement (PMC10503363; doi:10.1136/bmjopen-2023-074626), 2023-09-12
Supplement: bmjopen-2023-074626supp001.pdf [file bmjopen-2023-074626supp001.pdf]

1 **Supplementary Material**

2

3 **Supplementary Material 1: TARGET working group members (alphabetical)**

4

5 *Steering committee*

6 Dr Aidan G. Cashin

7 Mr Harrison J. Hansford

8 Prof Miguel A. Hernán

9 Dr Hopin Lee

10 Dr Matthew D. Jones

11 Prof James H. McAuley

12 A/Prof Sonja A. Swanson

13

14 *Project team*

15 A/Prof Issa J. Dahabreh

16 A/Prof Barbra A. Dickerman

17 Prof Matthias Egger

18 Dr Xabier Garcia-Albeniz

19 Prof Robert M. Golub

20 A/Prof Nazrul Islam

21 A/Prof Sara Lodi

22 A/Prof Margarita Moreno-Betancur

23 Prof Sallie A. Pearson

24 Prof Sebastian Schneeweiss

25 Prof Jonathan A. C. Sterne

26 Dr Melissa K. Sharp

27 Prof Elizabeth A. Stuart

28

29

30 **Supplementary Material 2:** Complete search strategies for all databases

31

32 Medline

33 1 (emulat\* adj5 trial?).mp.

34 2 (target adj (trial? or experiment?)).mp.

35 3. (observational adj (stud\* or research or data)).mp.

36 4. ((real world or rwd) adj2 (stud\* or research or data)).mp.

37 5. (routine\* adj2 data).mp.

38 6. (comparative effectiveness adj2 (stud\* or research or data)).mp.

39 7. (emulat\* or propensity score? or (causal adj2 (inference? or analys?s or  
40 effect\*))).mp.

41 8. 3 or 4 or 5 or 6 or 7

42 9. 2 and 8

43 10. (target adj (trial? or experiment?)).ti.

44 11. 1 or 9 or 10

45 Filtered for time (2012-2022) manually after search

46

47 Embase

48 1. (emulat\* adj5 trial?).mp.

49 2. (target adj (trial? or experiment?)).mp.

50 3. (observational adj (stud\* or research or data)).mp.

51 4. ((real world or rwd) adj2 (stud\* or research or data)).mp.

52 5. (routine\* adj2 data).mp.

53 6. (comparative effectiveness adj2 (stud\* or research or data)).mp.

54 7. (emulat\* or propensity score? or (causal adj2 (inference? or analys?s or  
55 effect\*))).mp.

56 8. 3 or 4 or 5 or 6 or 7

57 9. 2 and 8

58 10. (target adj (trial? or experiment?)).ti.

59 11. 1 or 9 or 10

60

61 psycINFO

62 noft(target trial emulat\*) OR ((noft(real world data) OR (noft(emulat\* trial)) OR

63 noft(observational) OR noft(routine\* data)) AND noft(comparative effective\*)

64 AND noft(causal infer\*))

65

66 Web of Science

67 (TI=(emulat\* trial)) OR (TI=(real world data) OR TI=(routine\* data) OR

68 TI=(comparative effectiveness study comparative effectiveness research or  
69 comparative effectiveness data) OR (TI=(emulat\* or propensity score?) AND

70 TI=(causal inference or causal analysis or causal effect\*)) AND ALL=(target

71 trial or emulat\* or target trial emulation)
